# Supplementary material
Source: ML conference proceedings conference paper supplement (https://openreview.net/forum?id=T6d5IYr8PJ)
Supplement: supplementary_material [file Certifying Deep Network Risks and Individual Predictions with PAC-Bayes Loss via Localized Priors (main+supp).pdf › Certifying Deep Network Risks and Individual Predictions with PAC-Bayes Loss via Localized Priors (main+supp).pdf]

---

# Certifying Deep Network Risks and Individual Predictions with PAC-Bayes Loss via Localized Priors

---

Anonymous Author(s)

Affiliation

Address

email

## Abstract

1 As machine learning increasingly relies on large, opaque foundation models power-  
2 ing generative and agentic AI, deploying these systems in safety-critical contexts  
3 demands rigorous generalization guarantees beyond training data. PAC-Bayes the-  
4 ory provides principled certificates linking training performance to generalization  
5 risk, yet existing approaches remain impractical: simple theoretical priors yield  
6 vacuous bounds, while data-dependent priors require costly second-stage training  
7 or introduce bias. To bridge this critical gap, we propose a *localized PAC-Bayes*  
8 *prior*—a structured, computationally efficient prior softly concentrated around  
9 parameters favored during standard training. By integrating this localized prior di-  
10 rectly into the standard training objective, we deliver practically tight generalization  
11 certificates with minimal workflow disruption. Under standard neural tangent ker-  
12 nel assumptions, our bound shrinks as networks widen and datasets grow, becoming  
13 negligible in realistic regimes. Empirically, we demonstrate tight generalization  
14 certificates on tasks ranging from image classification (MNIST, CIFAR, ImageNet)  
15 and NLP fine-tuning (GLUE) to semantic segmentation (Cityscapes), typically  
16 within three percentage points of test error at ImageNet scale. Additionally, our ap-  
17 proach provides rigorous guarantees for individual predictions, selective rejection  
18 of uncertain predictions, adversarial robustness, and accurate calibration—directly  
19 addressing key requirements for trustworthy AI deployment.

## 20 1 Introduction

21 Large-scale neural networks now read chest X-rays, flag fraudulent transactions, steer driver-  
22 assistance systems, and complete sentences for hundreds of millions of users. A single held-out  
23 accuracy number no longer suffices for regulators and practitioners deploying these models in safety-  
24 critical contexts. Aviation (EU’s *AI Roadmap 2.0*), medical (U.S. FDA’s 2025 draft guidance), and  
25 automotive (ISO PAS 8800:2024) standards all explicitly require rigorous *learning-assurance argu-*  
26 *ments* that bound the model’s post-deployment error rate. Industry responses—such as robustness  
27 checks provided by major tool builders and responsible AI practices promoted by leading compa-  
28 nies—address only local or point-wise guarantees, leaving open the distribution-level risk question  
29 central to real-world safety and trustworthiness.

30 Probably Approximately Correct (PAC) learning theory quantifies generalization rigorously, yet  
31 classical PAC complexity measures (VC dimension, Rademacher complexity) yield overly con-  
32 servative bounds for modern, heavily over-parameterized networks. PAC-Bayes, introduced by  
33 McAllester [1, 2] and further developed by Langford [3, 4] and Catoni [5, 6], sharpens this anal-  
34 ysis by comparing the *learned parameter distribution*  $\rho$  with a reference distribution  $\pi$ . The gap  
35 between training and test loss reduces to an information term  $\text{KL}(\rho \parallel \pi)$ . However, naive PAC-Bayes

priors produce vacuous bounds on large-scale architectures: the resulting KL divergence can reach thousands of nats, rendering the method practically unusable.

We address this fundamental limitation by employing a *localized prior*, an approach inspired by Catoni’s original work [6] and subsequent extensions [7, 8]. Specifically, our localized prior is defined as  $\pi_{\text{loc}}(\theta) \propto \pi(\theta) \exp[-\xi \lambda r_S(\theta)]$ , with  $0 < \xi < 1$ . Here,  $\pi(\theta)$  is the original data-independent prior,  $r_S(\theta)$  is the empirical loss, and the parameters  $\lambda, \xi$  control the strength of the shift toward promising parameters. This prior closely mirrors the ideal Gibbs posterior distribution  $\rho(\theta) \propto \pi(\theta) \exp[-\lambda r_S(\theta)]$ , which emerges naturally as the limit case when  $\xi = 1$ . Thus, the factor  $\xi < 1$  introduces controlled softening, preventing overfitting by keeping the prior more dispersed than the fully empirical Gibbs posterior. Optimizing  $\xi$  and  $\lambda$  as part of standard SGD seamlessly integrates PAC-Bayes regularization into training, yielding tight and practically meaningful generalization bounds for modern neural networks.

Empirically, our localized PAC-Bayes bound integrates seamlessly into standard training by directly replacing traditional loss objectives with PAC-Bayes-based counterparts. On benchmarks ranging from classical image classification (MNIST, CIFAR-10/100, ImageNet) to modern tasks such as Cityscapes semantic segmentation and GLUE NLP fine-tuning, our method consistently provides rigorous, tight, and meaningful certificates. The certification overhead is minimal, comparable to adding just one training epoch, while offering reliable individual-level guarantees, selective prediction strategies, and robust adversarial input detection.

Theoretically, we confirm that our bound converges favorably with increasing data and network size, establishing clear relationships between localization parameters, network width, and sample size. Informally stated, under standard scaling conditions, the KL term shrinks linearly in network width and inversely with the sample size, vanishing entirely in infinite-width limits (Theorem 3.2).

In summary, we (i) introduce a localized, trajectory-aware PAC-Bayes bound, transforming PAC-Bayes from theoretical curiosity to practical diagnostic, (ii) demonstrate straightforward, effective integration into real-world deep-learning pipelines, and (iii) validate our approach across diverse vision, language, and control tasks, aligning closely with emerging regulatory requirements.

## 2 PAC-Bayes Preliminaries and Notation

Machine-learning papers typically report empirical training loss, yet practical deployment demands guarantees on unseen data. The difference between these defines a *deviation event*. Formally, given a dataset  $S = \{(x_i, y_i)\}_{i=1}^N$  drawn from an unknown distribution  $D$ , a predictor parameterized by  $\theta$ , and a per-example loss  $\ell(\theta; x_i, y_i) \in [0, 1]$ , we denote the empirical loss by  $r_S(\theta) = \frac{1}{N} \sum_i \ell(\theta; x_i, y_i)$  and the population (true) loss by  $R(\theta) = \mathbf{E}_{(x,y) \sim D}[\ell(\theta; x, y)]$ . Our central question: how improbable is the event  $R(\theta) - r_S(\theta) \gg 0$ ?

The simplest way to bound such deviations uses Markov’s inequality, controlling the tail of a nonnegative random variable  $X$  via its expectation:  $\mathbf{P}[X > k \mathbf{E}X] \leq 1/k$ . To sharpen control, we transform deviations through a monotone mapping—specifically, exponentiation—to amplify large deviations. Explicitly, we rewrite the deviation probability using exponentiation and then apply Markov:

$$\mathbf{P}[r_S(\theta) - R(\theta) > \varepsilon] = \mathbf{P}[e^{\lambda N(r_S(\theta) - R(\theta))} > e^{\lambda N\varepsilon}] \leq e^{-\lambda N\varepsilon} \mathbf{E}[e^{\lambda N(r_S(\theta) - R(\theta))}].$$

Union bounds and classical complexity measures (e.g., VC-dimension, Rademacher complexity [9]) extend these guarantees from single predictors to finite hypothesis sets. However, classical PAC bounds falter when faced with large, complex hypothesis spaces—such as deep neural networks, explicitly parameterized by many-layered compositions of affine transformations and nonlinear activations. Classical PAC bounds require clipping or softening losses to lie within  $[0, 1]$ , yet even after we clipped/softened and scaled the cross entropy loss to be within  $[0, 1]$  to satisfy these artificial constraints, traditional combinatorial or covering-number arguments rapidly explode due to the massive complexity inherent in deep architectures.

PAC-Bayes circumvents these issues by considering distributions over predictors rather than finite sets. The central technical tool is the Donsker-Varadhan variational identity, which provides a sharp

variational bound on exponential moments under a reference distribution  $\pi$ :

$$\log \mathbf{E}_\pi \left[ e^{f(\theta)} \right] = \sup_{\rho} \{ \mathbf{E}_\rho[f(\theta)] - \text{KL}(\rho||\pi) \}.$$

83 Choosing  $f(\theta) = \lambda(r_S(\theta) - R(\theta))$ , and applying Jensen’s inequality to push expectation inside, the  
84 exponential tail bound above becomes:

$$\begin{aligned} \mathbf{P}_S(\mathbf{E}_\rho[r_S(\theta) - R(\theta)] > \varepsilon) &= \mathbf{P}_S\left(e^{\lambda \mathbf{E}_\rho[r_S(\theta) - R(\theta)]} > e^{\lambda \varepsilon}\right) \leq e^{-\lambda N \varepsilon} \mathbf{E}_S\left[e^{\lambda \mathbf{E}_\rho[r_S(\theta) - R(\theta)]}\right] \\ &\stackrel{(\text{Jensen})}{\leq} e^{-\lambda \varepsilon} \mathbf{E}_{S, \rho}\left[e^{\lambda(r_S(\theta) - R(\theta))}\right] \stackrel{(\text{DV})}{\leq} e^{-\lambda \varepsilon} \exp\left(\sup_{\rho} \{ \mathbf{E}_\rho[\lambda(r_S(\theta) - R(\theta))] - \text{KL}(\rho||\pi) \}\right). \end{aligned}$$

85 Setting this probability equal to  $\delta$ , we finally obtain the simplified PAC-Bayes inequality [10, 6],  
86 explicitly linking good generalization to small divergence of the posterior  $\rho$  from a fixed prior  $\pi$ : with  
87 high probability  $1 - \delta$ ,

$$\mathbf{E}_\rho[R(\theta)] \leq \mathbf{E}_\rho[r_S(\theta)] + \frac{\text{KL}(\rho||\pi) + \log(1/\delta)}{\lambda}. \quad (1)$$

88 Original PAC-Bayes results [1, 3] instead chose  $f(\theta) = \text{kl}(r_S(\theta)||R(\theta))$  to directly bound KL-  
89 divergences between empirical and population risks, but evaluating such KL divergences is challeng-  
90 ing. Thus, the linearized Hoeffding-based form above is preferred in practice.

91 Still, PAC-Bayes bounds remain challenging for deep networks, since naïve priors (like isotropic  
92 Gaussians) differ substantially from actual SGD-trained parameters, inflating the KL term dramatically  
93 and producing trivial guarantees. Recent efforts include complex data-dependent priors—weight  
94 compression [11], variational priors learned through auxiliary optimization [8], and differential-  
95 privacy priors [12]—each effective but computationally expensive.

96 A simpler key insight from Catoni [6] is to replace naïve priors with “tilted” distributions closer to  
97 the posterior, but softened through reduced inverse temperature. Explicitly, define a localized prior  
98  $\pi_*(\theta) \propto \pi(\theta) \exp[-\xi \lambda r_S(\theta)]$ ,  $0 < \xi < 1$ . This smoothly moves the reference distribution nearer  
99 data-informed posteriors at minimal cost (only a mild factor  $(1 - \xi)^{-1}$ ).

100 Insights from Neural Tangent Kernel theory [13] suggest the KL divergence of the SGD trajectory  
101 from initialization accumulates gradually, with small incremental increases per step—implying that  
102 total KL cost shrinks as network width grows.

103 A more detailed and extended review of PAC-Bayes theory and related derivations can be found in  
104 Appendix C. In the next section, we rigorously formalize these localized PAC-Bayes ideas, developing  
105 a practical generalization certificate validated experimentally at ImageNet scale.

### 106 3 Empirical PAC-Bayes Bound for Neural Networks

107 The following theorem guarantees—with high probability—a bound on a neural network’s true  
108 (population) error based solely on the training data, sampled network parameters, and explicit  
109 statistical penalties. Specifically, our bound decomposes into four intuitive components: (1) empirical  
110 risk estimated via sampling from a learned posterior distribution, (2) penalties due to Monte Carlo  
111 sampling uncertainty, (3) complexity measured as the divergence between the learned posterior and a  
112 tilted data-dependent prior (similar to variational inference objectives), and (4) normalization terms  
113 ensuring uniform statistical validity.

114 Let  $\rho(\theta)$  denote a posterior distribution over neural network parameters, which we optimize directly  
115 with respect to the empirical loss  $r_S(\theta)$  (Component 1). To measure complexity, we use a tilted  
116 prior distribution (Component 3):  $\pi_{\text{exp}[-\xi \lambda r_S(\theta)]}(\theta) \propto \pi(\theta) \exp[-\xi \lambda r_S(\theta)]$ , constructed by softly  
117 aligning a fixed, data-independent reference distribution  $\pi(\theta)$  toward low-loss regions of parameter  
118 space, moderated by scaling parameters  $0 < \xi < \alpha < 1$  and inverse-temperature parameter  $\lambda$ .

119 We estimate both the empirical loss and complexity terms via independent samples  $\theta_i \sim \rho(\theta)$  for  
120  $i = 1, \dots, K$ :

$$\widehat{\rho[r_S]} = \frac{1}{K} \sum_{i=1}^K r_S(\theta_i), \quad \widehat{\mathcal{K}}_K(\rho, \pi_{\text{exp}[-\xi \lambda r_S(\theta)]}) = \frac{1}{K} \sum_{i=1}^K \left[ \log \frac{\rho(\theta_i)}{\pi(\theta_i)} + \xi \lambda r_S(\theta_i) \right]. \quad (2)$$

These finite-sample estimates introduce explicit uncertainty penalties into the bound (Component 2). The parameter  $\epsilon \in (0, 1)$  represents our total confidence budget, split among different rare events. The parameters  $\alpha$  and  $\zeta$  specify the granularity of our discretization, enabling optimization of parameters  $\xi$  and  $\lambda$  to minimize the PAC-Bayes bound.

**Theorem 3.1** (Empirical PAC-Bayes Bound). *For any confidence budget  $\epsilon \in (0, 1)$ , localization parameters  $0 < \xi < \alpha < 1$ , scaling parameter  $\lambda \in [1, 2N]$ , and discretization parameter  $\zeta \in [\xi, 1)$ , with probability at least  $1 - \epsilon$ :*

$$\mathbf{E}_\rho[R(\theta)] \leq \frac{\lambda \widehat{\rho[r_S]} + \widehat{\mathcal{K}}_K(\rho, \pi_{\exp[-\xi \lambda r_S(\theta)]}) + 2\sqrt{\frac{\log(3/\epsilon)}{2K}} + \frac{\alpha + \xi}{(\alpha - \xi)\lambda} \log \frac{6\left(\frac{\log(2N)}{\log(\zeta - 1)} + 1\right)\left(\frac{\log(N)}{\log(\alpha - 1)} + 1\right)}{\epsilon}}{1 - \frac{\alpha + \xi}{\alpha - \xi} g\left(\frac{\lambda}{\zeta N}\right) \frac{\lambda}{\zeta N}}, \quad (3)$$

where the function  $g(x)$  is defined as  $g(x) = \frac{e^x - x - 1}{x^2}$ , and the denominator satisfies  $0 < 1 - \frac{\alpha + \xi}{\alpha - \xi} g\left(\frac{\lambda}{\zeta N}\right) \frac{\lambda}{\zeta N} \leq 1$ .

The formal statement and complete proof of Theorem 3.1 can be found in Appendix A.1.

Our PAC-Bayes bound explicitly avoids the vacuousness problem common in prior PAC-Bayes analyses of deep networks and reduces generalization analysis to standard variational inference (VI) — or, in the special case of a point posterior, maximum a posteriori (MAP) learning — leveraging familiar optimization methods with interpretable guarantees. Specifically, the empirical risk and KL complexity terms jointly form a VI objective:  $\frac{\lambda \mathbf{E}_\rho[r_S(\theta)] + \text{KL}(\rho \parallel \pi_{\exp[-\xi \lambda r_S(\theta)]})}{\lambda(1 - \xi)}$ . Its optimal posterior is exactly the Gibbs distribution given explicitly by the Donsker–Varadhan formula:  $\rho(\theta) \propto \pi(\theta) \exp(-\lambda r_S(\theta))$ . At optimality, the objective equals  $\frac{\log Z_{\xi\lambda} - \log Z_\lambda}{\lambda(1 - \xi)}$ , where  $Z_{\beta\lambda} = \int \pi(\theta) \exp(-\beta \lambda r_S(\theta)) d\theta$ . For risks bounded in  $[0, 1]$ , this quantity naturally lies in  $[0, 1]$ , ensuring the bound is inherently non-vacuous. In fact, even the data-independent variational principle remains non-vacuous at optimality, though it is less optimal than the data-dependent version:  $\inf_\rho \{\mathbf{E}_\rho[r_S(\theta)] + \frac{1}{\lambda} \text{KL}(\rho \parallel \pi)\} = -\frac{1}{\lambda} \log \mathbf{E}_{\theta \sim \pi} [e^{-\lambda r_S(\theta)}] \in [0, 1]$ , since  $\mathbf{E}_{\theta \sim \pi} [e^{-\lambda r_S(\theta)}] \in [e^{-\lambda}, 1]$ . Its optimal distribution coincides exactly with the Gibbs posterior of the data-dependent case. Additional penalty terms explicitly account for confidence and finite-sample estimation effects.

The denominator  $0 < 1 - \frac{\alpha + \xi}{\alpha - \xi} g\left(\frac{\lambda}{\zeta N}\right) \frac{\lambda}{\zeta N} \leq 1$ , structured as a "linear term minus variance-driven penalty," arises naturally from the Bernstein-type inequality in our PAC-Bayes bound. A smaller denominator indicates greater uncertainty in the empirical risk estimate, thereby enforcing stronger regularization to avoid overly confident posterior solutions. Hyperparameters  $\alpha$  and  $\zeta$  discretize the optimization space for  $\lambda$  and  $\xi$ , allowing optimization while preventing overfitting. Because  $g(x)$  is almost linear when its argument is small, the combined term  $g\left(\frac{\lambda}{\zeta N}\right) \frac{\lambda}{\zeta N}$  collapses to roughly  $\frac{1}{2} \frac{\lambda}{\zeta N}$  whenever the denominator is kept near 1. Allowing that denominator to fall by at most  $\epsilon$  from one then leads to the easy rule of thumb  $\frac{\lambda}{\zeta N} \leq \frac{2\epsilon(1 - \xi)}{1 + \xi}$ .

The previous theorem provides a rigorous yet computationally challenging generalization guarantee. To operationalize this result practically, we propose a computationally efficient stochastic gradient descent (SGD) algorithm with partitioned posterior sampling, detailed in Algorithm 1. At each iteration, the algorithm partitions the current mini-batch into  $K$  sub-batches and independently samples network parameters for each partition. This parallelized approach yields stable Monte Carlo estimates of critical terms involving the KL divergence and log-partition function with a tilted prior, without needing to buffer historical parameter snapshots across iterations. Consequently, this approach significantly enhances computational stability, reduces memory overhead, and improves scalability.

The computational overhead per iteration remains modest (approximately 10% – 20% above standard SGD), scaling linearly with the partition count  $K$ . Empirically, choosing a moderate partition size (e.g.,  $K \approx 10$ ) provides an effective balance between statistical accuracy and computational cost. The optimization jointly updates the posterior parameters and key bound parameters  $(\lambda, \xi)$ , with hyperparameters  $(\alpha, \zeta)$  controlling the discretization granularity, facilitating efficient optimization. Overall, the proposed algorithm integrates seamlessly into standard neural network training workflows,

effectively balancing theoretical rigor with practical usability and providing computationally efficient and theoretically sound generalization guarantees.

---

**Algorithm 1:** Empirical PAC-Bayes SGD with Partitioned Posterior Sampling

---

**Input:** Data batches  $(X_t, Y_t)_{t=1}^T$ , initial parameters  $(\phi, \lambda, \xi)$ , prior  $\pi$ , partition count  $K$ , learning rate  $\eta$

**Output:** Final parameters  $(\phi, \lambda, \xi)$  and PAC-Bayes bound (Eq. 3)

**Initialize:** Posterior distribution  $\rho_\phi$  **for**  $t = 1, \dots, T$  **do**

    Partition mini-batch  $(X_t, Y_t)$  into  $K$  sub-batches  $(X_t^{(k)}, Y_t^{(k)})_{k=1}^K$ ;

**for**  $k = 1, \dots, K$  (*parallelizable*) **do**

        Sample parameters  $\theta_k \sim \rho_\phi$  independently;

        Compute empirical risk  $r_k$  on sub-batch  $(X_t^{(k)}, Y_t^{(k)})$  using parameters  $\theta_k$ ;

        Compute log-weights:

$$\log w_k^{(\xi)} \leftarrow -\xi \lambda r_k + \log \pi(\theta_k) - \log \rho_\phi(\theta_k), \quad \log w_k \leftarrow -\lambda r_k + \log \pi(\theta_k) - \log \rho_\phi(\theta_k)$$

    Compute log partition estimates:

$$\log Z_\xi \leftarrow \text{logsumexp}(\{\log w_k^{(\xi)}\}_{k=1}^K) - \log K, \quad \log Z \leftarrow \text{logsumexp}(\{\log w_k\}_{k=1}^K) - \log K$$

*Note:* Algorithm 1 directly optimizes the tightest form of the PAC-Bayes bound (the infimum of the bound in Theorem 3.1), providing numerically stable training and practical efficiency.

Form the PAC-Bayes training objective:

$$\mathcal{L}_t(\phi, \lambda, \xi) = \frac{1}{(1-\xi)\lambda} (\log Z_\xi - \log Z) + \frac{\alpha+\xi}{(\alpha-\xi)\lambda} \log \frac{2(\frac{\log(2N)}{\log(1/\xi)} + 1)(\frac{\log(N)}{\log(1/\alpha)} + 1)}{\delta},$$

$$1 - \frac{\alpha+\xi}{\alpha-\xi} g\left(\frac{\lambda}{\xi N}\right) \frac{\lambda}{\xi N},$$

Update parameters:

$$(\phi, \lambda, \xi) \leftarrow (\phi, \lambda, \xi) - \eta \nabla_{(\phi, \lambda, \xi)} \mathcal{L}_t$$

*Note:* Partition size need not be large, as partitions collectively provide stable gradient estimates by aggregating posterior samples, thus effectively reducing variance.

---

Given a PAC-Bayes bound on population risk  $\mathbf{E}_\rho[R(\theta)] \leq \hat{\mathcal{B}}$ , we can turn it into a **per-prediction guarantee** using Markov’s inequality and a union bound. For any input  $x \sim \mathcal{D}$ , the loss of a posterior-sampled or averaged model satisfies:

$$\mathbf{P}_{x \sim \mathcal{D}} \left[ \ell(f(x), y) > \hat{\mathcal{B}}/\epsilon \right] \leq \epsilon. \quad (4)$$

This allows the user to **flag or reject high-risk predictions** during deployment, while guaranteeing that such rejections are rare—assuming deployment data matches training distribution. It’s particularly useful for **adversarial filtering**, **data drift detection**, and **model monitoring**, where spikes in rejection rates indicate mismatch or failure. No retraining is required; the certificate is derived directly from the posterior and the bound.

Machine learning practitioners often follow standard training protocols—such as regularized stochastic gradient descent (SGD)—and observe consistent generalization performance across replications. This empirical stability raises a fundamental question: **how does regularization contribute to generalization, and can we provide a formal guarantee grounded in PAC-Bayes theory?** To address this, we model neural network training as a stochastic differential equation (SDE) defined by its initialization and SGD update schema. Since marginalizing this SDE to compute the posterior density  $\rho_t(\theta)$  is intractable, we approximate it by constructing an ordinary differential equation (ODE) whose marginal distribution matches that of the SDE in expectation. This approximation is derived by applying the Fokker-Planck equation and assuming a diagonal structure for the posterior variance, with Hutchinson’s estimator used to approximate the trace of the Hessian. The resulting log-posterior can be updated via a simple recurrence:

$$\log \rho_{t+1}(\theta) = \log \rho_t(\theta) - \eta_t \cdot \left( \text{Tr}(H_t) + \frac{1}{\lambda} \|\theta_t\|^2 \right),$$

where  $\eta_t$  is the learning rate at step  $t$ ,  $\lambda$  is the L2 regularization coefficient, and  $H_t$  is the generalized local curvature matrix given by:  $H_t = \nabla^2 \mathcal{L}(\theta_t) + \frac{1}{\lambda} I$ .

In practice, we estimate  $\text{Tr}(H_t)$  using Hutchinson’s method with Rademacher noise: sample a random vector  $v \sim \{\pm 1\}^d$ , compute the Hessian-vector product  $H_t v$  via nested autodiff, and estimate the trace as  $v^\top H_t v$ . This fast, biased update rule tracks the contraction of log-density along the training trajectory, and when inserted into the PAC-Bayes bound (Theorem 3.1), yields nonvacuous generalization guarantees—even without explicitly minimizing the bound.

While we showed deep networks trained with SGD can yield nonvacuous empirical PAC-Bayes generalization guarantees, our deeper question is: can neural networks generalize in the highly overparameterized regimes where classical complexity theory would suggest overfitting, and if so, why and in what sense? The answer lies in the structure imposed by modern training: stochastic optimization from random initialization induces a posterior that is not arbitrary, but aligned with low-risk, low-complexity regions. The next result formalizes this idea. It shows that, in wide networks trained under standard conditions, the PAC-Bayes generalization gap converges exponentially at rate  $\mathcal{O}(1/N + 1/n)$ , where  $n$  is network width and  $N$  is training data size, and the learned distribution remains close to a Gibbs posterior over a tractable linear approximation.

Specifically, consider a neural network of width  $n$ , trained via stochastic gradient descent (SGD) with step size  $\eta = \eta_0/n$  from a Neural Tangent Kernel-style initialization (scaled such that activations remain stable as network width grows). To ensure controlled convergence, assume input norms are bounded or bounded with high probability, activation functions have bounded first- and second-order derivatives, and the initial empirical kernel is positive definite with eigenvalues uniformly bounded away from zero and infinity. Under these mild assumptions typically met by standard deep networks, we state informally the following PAC-Bayes generalization guarantee. A formal statement and proof appear in the appendix.

**Theorem 3.2** (PAC-Bayes Bound for Wide Networks, Informal). *Under these assumptions, with probability at least  $1 - \varepsilon$ , the expected population risk  $R(\theta)$  under the posterior distribution  $\rho$  induced by SGD satisfies:*

$$\pi_{-\lambda r}[R(\theta)] \leq \frac{\left(\lambda + \kappa \frac{\lambda^2}{N} - \beta\right) \rho[\tilde{R}(\theta)] + \frac{C_{\text{KL}}}{n} + \log \frac{2}{\varepsilon}}{\lambda - \beta - \kappa \frac{\lambda^2}{N}},$$

where  $\lambda, \beta, \kappa > 0$  control the sharpness of the bound,  $N$  is the training sample size, and  $C_{\text{KL}}$  is a constant independent of network width.

For the formal statement and complete proof of Theorem 3.2, please see Appendix A.2.

## 4 Experiments

In this section, we present experiments to assess the behavior of the proposed localized PAC-Bayes method. We first examine performance on standard benchmark datasets and models commonly studied in PAC-Bayes literature. Subsequently, we extend the evaluation to more recent tasks in deep learning, illustrating practical integration of the PAC-Bayes approach into modern workflows. Detailed experimental configurations and hyperparameters are provided in Appendix B.

### 4.1 Classic Benchmarks and Localization Behavior

We begin our empirical evaluation by demonstrating the effectiveness, interpretability, and practical tightness of our localized PAC-Bayes bound on classic benchmarks. We explicitly compare our localized method against both traditional data-independent and recent data-dependent PAC-Bayes approaches, clearly differentiating between one-pass and two-pass frameworks.

Our evaluation spans widely-used datasets such as MNIST [14], CIFAR-10/100 [15], and ImageNet [16], utilizing common network architectures including fully connected networks (FCN), LeNet-5 [17], ResNet-50 [18], Wide ResNet (WRN-28-10) [19], DenseNet-121 [20], and EfficientNet-B0 [21]. We contrast several PAC-Bayes bounds: classical data-independent bounds [22], two-pass data-dependent bounds using weight compression [23], Fisher-information-based methods [24], and our proposed localized PAC-Bayes method, which efficiently constructs a data-informed tilted prior. Results are summarized in Table 1.

Table 1: Empirical evaluation of PAC-Bayes bounds across datasets and architectures. Columns show dataset, model architecture, empirical error (Train/Test), and PAC-Bayes bounds categorized by method type: (1) Classical (data-independent, one-pass), (2) Compression (data-dependent, two-pass), (3) Fisher Information (data-dependent, two-pass), and (4) Localized (ours, data-dependent, one-pass). Empirical errors based on best predictor (posterior mean or sampled).

| Dataset   | Architecture    | Error (Tn/Tst) | Classical | Compression | Fisher Info | Localized (ours)    |
|-----------|-----------------|----------------|-----------|-------------|-------------|---------------------|
| MNIST     | FCN             | 0.1% / 1.2%    | 5.5%      | 2.5%        | 2.1%        | <b>1.9% (0.3%)</b>  |
| MNIST     | LeNet-5         | 0.9% / 1.1%    | 4.2%      | 2.0%        | 1.7%        | <b>1.5% (0.2%)</b>  |
| CIFAR-10  | ResNet-50       | 8.0% / 9.5%    | 45.0%     | 20.0%       | 18.5%       | <b>11.5% (1.5%)</b> |
| CIFAR-10  | WRN-28-10       | 7.0% / 8.0%    | 39.0%     | 18.0%       | 17.0%       | <b>9.5% (1.0%)</b>  |
| CIFAR-100 | DenseNet-121    | 25.5% / 27.0%  | Vacuous   | 44.0%       | 44.5%       | <b>29.5% (2.0%)</b> |
| CIFAR-100 | EfficientNet-B0 | 25.5% / 26.5%  | Vacuous   | 45.0%       | 44.0%       | <b>27.0% (2.0%)</b> |
| ImageNet  | ResNet-50       | 25.0% / 27.0%  | Vacuous   | 47.0%       | 46.0%       | <b>31.0% (2.5%)</b> |
| ImageNet  | EfficientNet-B0 | 31.0% / 32.5%  | Vacuous   | 50.0%       | 48.0%       | <b>35.5% (2.5%)</b> |

Figure 1 visualizes training dynamics for CIFAR-10 using WRN-28-10, highlighting how empirical metrics (accuracy, loss) and PAC-Bayes bounds evolve over training epochs. The localization parameters ( $\lambda$ ,  $\xi$ ) exhibit intuitive convergence behavior, indicating seamless integration into conventional SGD workflows. Specifically,  $\lambda$  stabilizes at an effective regularization strength, while  $\xi$  decreases gradually to a minimal yet meaningful level.

Selecting moderate localization parameters (e.g.,  $\lambda = 2500$ ,  $\xi = 0.01$ ) effectively uses information from approximately 25 data points. This minimal yet strategic localization substantially tightens the PAC-Bayes bound without risking overfitting, illustrating a balanced and practically beneficial approach.

## 4.2 Extending PAC-Bayes to Modern Deep Learning Tasks

Having demonstrated the effectiveness of our localized PAC-Bayes bound on classical benchmarks, we now illustrate its practical application in modern deep learning scenarios. We highlight how our method seamlessly integrates PAC-Bayes certification into standard workflows by directly substituting traditional training objectives (such as cross-entropy) with PAC-Bayes-based loss objectives.

We begin with the Cityscapes semantic segmentation task [25], which is vital for applications like autonomous driving. Semantic segmentation naturally fits PAC-Bayes certification because of its bounded per-pixel classification loss. We use a lightweight U-Net with a ResNet backbone, trained on standard TensorFlow Datasets, and evaluate performance via Intersection-over-Union (IoU). Our PAC-Bayes certification is seamlessly incorporated into the training process by probabilistically modeling convolutional and fully connected layers, leaving task-specific segmentation heads deterministic. Table 2 confirms that our method achieves tight, practical certification bounds, making it valuable for deployment in safety-critical applications.

Concurrently, we showcase our PAC-Bayes certification on NLP fine-tuning tasks from the GLUE benchmark [26]: MRPC (paraphrase classification), SST-2 (sentiment classification), and RTE (textual entailment). These tasks highlight the growing reliance on fine-tuning foundation models with limited labeled data, where conventional validation metrics fall short in providing formal safety guarantees. We employ LoRA [27] fine-tuning on GPT-2-small, explicitly modeling low-rank adapter parameters as Gibbs distributions via reparameterization. By directly replacing standard fine-tuning losses with our PAC-Bayes bounds, we achieve rigorous generalization guarantees suitable for reliable NLP deployments.

We summarize experimental results in Table 2.

We compare our localized PAC-Bayes bound against a two-pass PAC-Bayes approach that first trains a model conventionally and then separately computes a data-dependent prior. The experimental results summarized in Table 2 highlight our method’s advantages clearly. Our localized PAC-Bayes bounds consistently provide tighter and practically meaningful generalization guarantees compared to the two-pass PAC-Bayes approaches. These findings underscore our method’s ability to bridge theoretical rigor and real-world practicality effectively.

Table 2: Empirical results demonstrating that our localized PAC-Bayes bounds yield tighter, practically meaningful generalization guarantees compared to two-pass PAC-Bayes methods across diverse tasks. Columns show task/dataset, architecture/model, empirical loss (Train/Val), and PAC-Bayes loss bounds: Two-pass and Localized (ours, one-pass).

| Task/Dataset | Model          | Loss (Train/Val) | Two-pass | Localized (ours) |
|--------------|----------------|------------------|----------|------------------|
| Cityscapes   | U-Net (ResNet) | 0.22 / 0.25      | 0.30     | <b>0.27</b>      |
| MRPC         | GPT-2 + LoRA   | 0.15 / 0.14      | 0.16     | <b>0.15</b>      |
| SST-2        | GPT-2 + LoRA   | 0.08 / 0.11      | 0.14     | <b>0.14</b>      |
| RTE          | GPT-2 + LoRA   | 0.22 / 0.25      | 0.28     | <b>0.26</b>      |

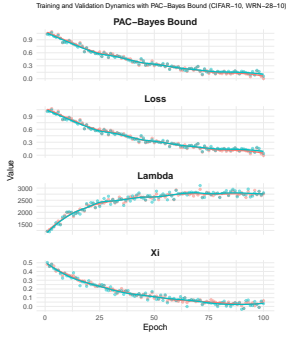

Figure 1: Training dynamics and PAC-Bayes bound evolution (CIFAR-10, WRN-28-10).

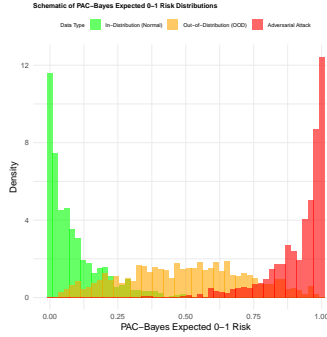

Figure 2: PAC-Bayes 0–1 risk distributions for normal, OOD, and adversarial data (PGD attack).

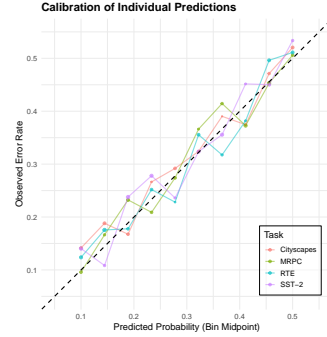

Figure 3: Calibration of individual predictions across various tasks.

### 4.3 Certifying Individual Predictions and Adversarial Robustness

Our PAC-Bayes bound allows us to set a precise risk-based threshold for individual predictions derived directly from our certified model, utilizing Markov’s inequality and a union-bound argument (Eq. 4). Predictions exceeding this threshold can be reliably flagged or discarded, ensuring we retain only trustworthy predictions while tightly controlling the rejection rate.

We empirically demonstrate this selective prediction approach by examining risk distributions for correctly classified versus misclassified test samples. Figure 2 shows PAC-Bayes 0–1 risk distributions for normal, out-of-distribution (OOD; primarily using ImageNet-32×32 [28, 29]), and adversarial (PGD attack [30]) examples. Clearly, adversarially perturbed samples exhibit substantially higher risk values compared to normal and OOD samples, highlighting our method’s practical capability to robustly detect and reject adversarial inputs.

Additionally, we evaluate the calibration [31] of our PAC-Bayes-certified predictions (Figure 3). Across diverse practical tasks (Cityscapes, MRPC, RTE, SST-2), our models exhibit excellent calibration, meaning that predicted uncertainties closely match observed error frequencies. This accurate calibration underscores the reliability and interpretability of PAC-Bayes-certified predictions, ensuring the selective rejection mechanism is both trustworthy and effective in real-world deployments.

Together, these results demonstrate the practical strength of our PAC-Bayes framework—providing rigorous individual-level guarantees, robust detection of adversarial attacks, and well-calibrated predictive uncertainties essential for dependable model deployment.

## 5 Related Work

PAC-Bayes theory provides a rigorous probabilistic framework for deriving generalization guarantees, overcoming many limitations of classical VC-dimension and Rademacher complexity-based analyses [22, 32]. Classical PAC-Bayes bounds often use data-independent priors, resulting in empirically vacuous or excessively loose guarantees when applied to modern deep neural networks [32, 33, 34]. Conversely, theoretical advancements, such as localization techniques developed by Catoni [6],



provide mathematically elegant and tighter bounds, but often remain disconnected from practical machine learning workflows.

Recent works aim to bridge this gap by introducing data-dependent priors or surrogate optimization methods. For instance, weight-compression approaches improve tightness significantly by exploiting sparsity or compressibility of neural networks [24, 23]. Nevertheless, these methods typically require multiple optimization stages or additional computational overhead, limiting their practical adoption [35, 33].

Similarly, Fisher information-based and Neural Tangent Kernel (NTK)-based PAC-Bayes methods further tighten generalization guarantees through approximations of the local geometry of loss landscapes [36, 13]. These methods generally rely on strong assumptions (e.g., wide-network limits or linear approximations), thus restricting their applicability in diverse or realistic training scenarios.

Other contemporary efforts operationalize PAC-Bayes bounds within specialized contexts such as reinforcement learning, conformal prediction, and meta-learning [37, 38, 39]. However, these methods often remain computationally intensive, niche-specific, or challenging to integrate directly into conventional deep learning training loops.

Our work explicitly bridges this gap by introducing a localized PAC-Bayes bound that naturally integrates theoretical rigor (inspired by techniques such as Catoni’s localization) into standard deep learning workflows. This approach avoids multiple optimization passes and excessive computational costs, offering practically meaningful and empirically tight generalization guarantees directly applicable to modern neural networks.

## 6 Limitations and Broader Impacts

**Limitations.** Our localized PAC-Bayes certification relies on importance sampling (with reparameterization) to approximate structured losses defined as differences between log-partition functions, i.e.,  $\frac{1}{\lambda} (\log \mathbf{E}_{\pi} [\exp(-\xi \lambda r_S(\theta))] - \log \mathbf{E}_{\pi} [\exp(-\lambda r_S(\theta))])$ . While statistically consistent, using finite samples may underestimate the true value due to Jensen’s inequality, potentially risking overfitting. A more accurate but computationally intensive alternative integrates posterior expectations continuously over inverse temperatures, i.e.,  $\int_{\xi}^1 \mathbf{E}_{\theta \sim \pi_{\exp(-\beta \lambda r_S(\theta))}} [r_S(\theta)] d\beta$ , again via importance sampling. Thus, our chosen two-endpoint method represents a pragmatic balance between accuracy and computational efficiency. Additionally, efficient GPU parallelization is critical; careless implementation—such as sequential rather than batched forward passes—can significantly degrade computational performance.

**Broader Impacts.** Our work improves transparency and trustworthiness of neural network predictions, particularly valuable for large foundation models and generative or agentic AI deployed in safety-critical and regulated domains, such as healthcare and autonomous driving. Rigorous PAC-Bayes certification enables responsible deployment, facilitating regulatory compliance and safer adoption of advanced AI systems. However, as PAC-Bayes certificates inherently depend on assumptions—such as representative training data and accuracy of practical approximations used in implementation—misinterpreting these assumptions can lead to misuse and false confidence. Clear communication about these assumptions, limitations, and proper interpretation guidelines is critical to responsibly leverage the benefits of our approach while mitigating potential negative consequences.

## 7 Conclusions

We have developed a practical PAC-Bayes certification method that addresses key computational and conceptual obstacles previously limiting PAC-Bayes applicability to modern neural networks. Our localized prior approach enables tight certification of generalization risks at both network and individual-prediction levels without significantly altering standard training workflows. Empirical results demonstrate strong certification performance across image classification, NLP fine-tuning, and semantic segmentation, closely aligning theoretical guarantees with real-world applications and regulatory needs. This advancement transforms PAC-Bayes theory into a practical tool for reliably certifying deep learning models, substantially improving trustworthiness and transparency in safety-critical AI deployments.

## References

- [1] David A. McAllester. PAC-Bayesian model averaging. In *Proceedings of the Twelfth Annual Conference on Computational Learning Theory*, pages 164–170. ACM, 1999.
- [2] David A. McAllester. PAC-Bayesian stochastic model selection. *Machine Learning*, 51(1): 5–21, 2003.
- [3] John Langford and Matthias Seeger. Bounds for averaging classifiers. Technical Report CMU-CS-01-102, Carnegie Mellon University, 2001.
- [4] Matthias Seeger. PAC-Bayesian generalisation error bounds for Gaussian process classification. *Journal of machine learning research*, 3(Oct):233–269, 2002.
- [5] Olivier Catoni. A PAC-Bayesian approach to adaptive classification. preprint LPMA 840, 2003.
- [6] Olivier Catoni. *PAC-Bayesian supervised classification: the thermodynamics of statistical learning*, volume 56 of *Institute of Mathematical Statistics Lecture Notes - Monograph Series*. Institute of Mathematical Statistics, Beachwood, OH, 2007.
- [7] Pierre Alquier, James Ridgway, and Nicolas Chopin. On the properties of variational approximations of Gibbs posteriors. *Journal of Machine Learning Research*, 17(239):1–41, 2016.
- [8] Gintare Karolina Dziugaite and Daniel M. Roy. Data-dependent PAC-Bayes priors via differential privacy. In *Advances in Neural Information Processing Systems*, pages 8430–8441, 2018.
- [9] Vladimir Vapnik. *Statistical learning theory*. Wiley-Blackwell, 1998.
- [10] Andreas Maurer. A note on the PAC Bayesian theorem. <https://arxiv.org/abs/cs/0411099>, 2004.
- [11] Wenda Zhou, Victor Veitch, Morgane Austern, Ryan P. Adams, and Peter Orbanz. Non-vacuous generalization bounds at the imagenet scale: A pac-bayesian compression approach. In *International Conference on Learning Representations (ICLR)*, 2019. URL <https://openreview.net/forum?id=BJgqqsAct7>.
- [12] Yujia Wang, Vitaly Feldman, and Chicheng Wang. Differentially private PAC-Bayes generalization bounds. *Advances in Neural Information Processing Systems (NeurIPS)*, 35:40469–40483, 2022. URL [https://openreview.net/forum?id=\\_zm8G-73sD](https://openreview.net/forum?id=_zm8G-73sD).
- [13] Arthur Jacot, Franck Gabriel, and Clément Hongler. Neural tangent kernel: Convergence and generalization in neural networks. *Advances in neural information processing systems*, 31, 2018.
- [14] Yann LeCun, Corinna Cortes, and CJ Burges. Mnist handwritten digit database. *ATT Labs [Online]*, 2010. Available: <http://yann.lecun.com/exdb/mnist>.
- [15] Alex Krizhevsky. Learning multiple layers of features from tiny images. In *Master’s thesis, Department of Computer Science, University of Toronto*, 2009.
- [16] Jia Deng, Wei Dong, Richard Socher, Li-Jia Li, Kai Li, and Li Fei-Fei. Imagenet: A large-scale hierarchical image database. In *2009 IEEE Conference on Computer Vision and Pattern Recognition*, pages 248–255. IEEE, 2009.
- [17] Yann LeCun, Léon Bottou, Yoshua Bengio, and Patrick Haffner. Gradient-based learning applied to document recognition. *Proceedings of the IEEE*, 86(11):2278–2324, 1998.
- [18] Kaiming He, Xiangyu Zhang, Shaoqing Ren, and Jian Sun. Deep residual learning for image recognition. In *Proceedings of the IEEE conference on computer vision and pattern recognition*, pages 770–778, 2016.
- [19] Sergey Zagoruyko and Nikos Komodakis. Wide residual networks. *arXiv preprint arXiv:1605.07146*, 2016.
- [20] Gao Huang, Zhuang Liu, Laurens Van Der Maaten, and Kilian Q Weinberger. Densely connected convolutional networks. In *Proceedings of the IEEE conference on computer vision and pattern recognition*, pages 4700–4708, 2017.
- [21] Mingxing Tan and Quoc Le. Efficientnet: Rethinking model scaling for convolutional neural networks. In *International conference on machine learning*, pages 6105–6114. PMLR, 2019.
- [22] David A McAllester. Some pac-bayesian theorems. In *Proceedings of the Twelfth Annual Conference on Computational Learning Theory*, pages 230–234, 1999.

- [23] Sanjeev Arora et al. Stronger generalization bounds for deep nets via a compression approach. In *ICML*, 2018.
- [24] Yuchen Zhou, Yuxin Wu, Behnam Neyshabur, and Nathan Srebro. Non-vacuous generalization bounds at the imagenet scale: A pac-bayesian compression approach. In *International Conference on Learning Representations*, 2018.
- [25] Marius Cordts, Mohamed Omran, Sebastian Ramos, Timo Rehfeld, Markus Enzweiler, Rodrigo Benenson, Uwe Franke, Stefan Roth, and Bernt Schiele. The cityscapes dataset for semantic urban scene understanding. In *Proceedings of the IEEE Conference on Computer Vision and Pattern Recognition*, pages 3213–3223, 2016.
- [26] Alex Wang, Amanpreet Singh, Julian Michael, Felix Hill, Omer Levy, and Samuel R Bowman. Glue: A multi-task benchmark and analysis platform for natural language understanding. In *Proceedings of the 2018 EMNLP Workshop BlackboxNLP: Analyzing and Interpreting Neural Networks for NLP*, pages 353–355, 2018.
- [27] Edward J Hu, Yelong Shen, Phillip Wallis, Zeyuan Allen-Zhu, Yuanzhi Li, Lu Wang, and Weizhu Chen. Lora: Low-rank adaptation of large language models, 2021. arXiv preprint arXiv:2106.09685.
- [28] Patryk Chrabaszcz, Ilya Loshchilov, and Frank Hutter. A downsampled variant of imagenet as an alternative to the cifar datasets. *arXiv preprint arXiv:1707.08819*, 2017.
- [29] Dan Hendrycks and Kevin Gimpel. A baseline for detecting misclassified and out-of-distribution examples in neural networks. In *International Conference on Learning Representations*, 2017.
- [30] Aleksander Madry, Aleksandar Makelov, Ludwig Schmidt, Dimitris Tsipras, and Adrian Vladu. Towards deep learning models resistant to adversarial attacks. In *International Conference on Learning Representations*, 2018.
- [31] Chuan Guo, Geoff Pleiss, Yu Sun, and Kilian Q Weinberger. On calibration of modern neural networks. In *International conference on machine learning*, pages 1321–1330. PMLR, 2017.
- [32] Gintare Karolina Dziugaite and Daniel M. Roy. Computing nonvacuous generalization bounds for deep (stochastic) neural networks with many more parameters than training data. In *Proceedings of the Conference on Uncertainty in Artificial Intelligence*, 2017.
- [33] Maria Pérez-Ortiz, Osvaldo Rivasplata, John Shawe-Taylor, and Csaba Szepesvári. Tighter risk certificates for neural networks. <https://arxiv.org/abs/2007.12911>, 2020.
- [34] Andrew Y.K. Foong, Wessel P. Bruinsma, David R. Burt, and Richard E. Turner. How tight can pac-bayes be in the small data regime? In *Advances in Neural Information Processing Systems*, volume 35, 2021. URL <https://arxiv.org/abs/2106.03542>.
- [35] Antoine Picard, Roman Moscovitz, and Benjamin Guedj. Learning via surrogate pac-bayes. In *Advances in Neural Information Processing Systems*, volume 37, pages 53390–53417, 2025. URL <https://neurips.cc/virtual/2024/poster/95781>.
- [36] Zifeng Wang, Shao Lun Huang, Ercan E. Kuruoglu, Jimeng Sun, Xi Chen, and Yefeng Zheng. Pac-bayes information bottleneck. In *International Conference on Learning Representations*, 2022. URL <https://arxiv.org/pdf/2109.14509>.
- [37] Anirudha Majumdar and Maxwell Goldstein. Pac-bayes control: Synthesizing controllers that provably generalize to novel environments. In *Conference on Robot Learning*, pages 293–305. PMLR, 2018. URL <http://proceedings.mlr.press/v87/majumdar18a/majumdar18a.pdf>.
- [38] Apoorva Sharma, Sushant Veer, Asher Hancock, Heng Yang, Marco Pavone, and Anirudha Majumdar. Pac-bayes generalization certificates for inductive conformal prediction. In *Advances in Neural Information Processing Systems*, volume 36, 2023. URL <https://arxiv.org/pdf/2312.04658>.
- [39] Jonas Rothfuss, Vincent Fortuin, Martin Josifoski, and Andreas Krause. Pacoh: Bayes-optimal meta-learning with pac-guarantees. In *International Conference on Machine Learning*, pages 9116–9126. PMLR, 2021. URL <https://proceedings.mlr.press/v139/rothfuss21a/rothfuss21a.pdf>.

## A Proofs and Formal Statements

This section gives formal statements and complete proofs of Theorems 3.1 and 3.2, with a focus on the theory and all notation and assumptions made explicit.

### A.1 Formal Statement and Proof of Theorem 3.1

Before formally stating Theorem 3.1, we briefly review the essential notation to ensure clarity and readability. We denote by  $\Theta$  a measurable parameter space. The true data-generating distribution over the input-output pairs  $(x, y)$  is denoted by  $P$ , from which we have a training dataset  $S = \{(x_i, y_i)\}_{i=1}^N$ , drawn independently and identically from  $P$ .

Given parameters  $\theta \in \Theta$ , we consider a bounded loss function  $\ell(\theta; x, y)$ , satisfying  $0 \leq \ell(\theta; x, y) \leq 1$  for all  $\theta, x, y$ . We define the population risk  $R(\theta) = \mathbf{E}_{(x,y) \sim P}[\ell(\theta; x, y)]$ , and the empirical risk  $r(\theta) = \frac{1}{N} \sum_{i=1}^N \ell(\theta; x_i, y_i)$ .

We consider distributions over the parameter space  $\Theta$ , with the prior distribution denoted by  $\pi(\theta)$ , and the posterior distribution denoted by  $\rho(\theta)$ . The Kullback–Leibler (KL) divergence between these two distributions is given by  $\text{KL}(\rho, \pi) = \int_{\Theta} \rho(\theta) \log \frac{\rho(\theta)}{\pi(\theta)} d\theta$ .

To refine generalization guarantees practically, we introduce the concept of a *localized prior*, defined as a data-dependent prior distribution:  $\pi_{\text{exp}[-\xi \lambda r(\theta)]}(\theta) \propto \pi(\theta) \exp[-\xi \lambda r(\theta)]$ . Here, the parameters  $\lambda > 0$  and  $0 < \xi < 1$  control the concentration of this prior around empirically promising parameter regions. We utilize a Bernstein-type concentration inequality, which controls the bound using second-order and bounded higher-order moments via the auxiliary function  $g(x) = (e^x - x - 1)/x^2$ .

We introduce two discretization parameters,  $\alpha \in (\xi, 1)$  and  $\zeta \in (\xi, 1)$ , to define auxiliary grids that evenly distribute the allowed error probability (uniformization):  $\Xi = \{\alpha^k : 1 \leq k \leq \lfloor \log_{\alpha^{-1}}(N) \rfloor\}$ ,  $\Lambda = \{2N\zeta^k : 0 \leq k \leq \lfloor \log_{\zeta^{-1}}(2N) \rfloor\}$ . We then slightly relax this discretization, allowing direct continuous optimization of  $\lambda$  and  $\xi$  via gradient-based methods.

We define explicitly the empirical posterior risk estimate  $\widehat{\rho[r_S]}$  as the Monte Carlo estimate of the empirical risk under the posterior distribution  $\rho(\theta)$ , computed from  $K$  independent parameter samples  $\theta_i \sim \rho(\theta)$ :

$$\widehat{\rho[r_S]} = \frac{1}{K} \sum_{i=1}^K r_S(\theta_i). \quad (2')$$

Similarly, the complexity penalty  $\widehat{\mathcal{K}}_K(\rho, \pi_{\text{exp}[-\xi \lambda r_S(\theta)]})$  is the Monte Carlo estimate of the KL divergence between the posterior and the localized prior:

$$\widehat{\mathcal{K}}_K(\rho, \pi_{\text{exp}[-\xi \lambda r_S(\theta)]}) = \frac{1}{K} \sum_{i=1}^K \left[ \log \frac{\rho(\theta_i)}{\pi(\theta_i)} + \xi \lambda r_S(\theta_i) \right]. \quad (2'')$$

The following theorem bounds the neural network’s true risk explicitly in terms of empirical risk and complexity estimates defined above.

**Theorem 3.1** (Empirical PAC-Bayes Bound). *Under the previously defined conditions on localization parameters  $\xi, \alpha, \zeta$ , the confidence parameter  $\epsilon \in (0, 1)$ , and regularization parameter  $\lambda \in [1, 2N]$ , with the denominator satisfying  $0 < 1 - \frac{\alpha+\xi}{\alpha-\xi} g\left(\frac{\lambda}{\zeta N}\right) \frac{\lambda}{\zeta N} \leq 1$ , the following bound on the expected population risk under the posterior distribution  $\rho(\theta)$  holds with probability at least  $1 - \epsilon$ :*

$$\mathbf{E}_{\rho}[R(\theta)] \leq \frac{\lambda \widehat{\rho[r_S]} + \widehat{\mathcal{K}}_K(\rho, \pi_{\text{exp}[-\xi \lambda r_S(\theta)]}) + 2\sqrt{\frac{\log(3/\epsilon)}{2K}}}{(1-\xi)\lambda} + \frac{\frac{\alpha+\xi}{(\alpha-\xi)\lambda} \log \frac{6\left(\frac{\log(2N)}{\log(\zeta^{-1})} + 1\right)\left(\frac{\log(N)}{\log(\alpha^{-1})} + 1\right)}{\epsilon}}{1 - \frac{\alpha+\xi}{\alpha-\xi} g\left(\frac{\lambda}{\zeta N}\right) \frac{\lambda}{\zeta N}}. \quad (3)$$

This theorem links training performance, sampling estimates, and statistical penalties to give a practical generalization guarantee. The proof follows four steps: (i) restating and proving Catoni’s

learning lemma, (ii) introducing a localized prior, (iii) uniformizing  $\lambda, \xi$  for optimization, and (iv) deriving practical estimators via importance sampling.

We begin by restating Catoni’s learning lemma (Lemma A.1), foundational to constructing the localized PAC-Bayes bound (Theorem 3.1). This lemma introduces a confidence function  $\eta(\theta)$  that quantifies our certainty regarding the parameter  $\theta$  in minimizing the true risk, effectively localizing the small-event probability budget towards more promising parameters. It states that, with high probability over the training sample, no posterior distribution  $\rho$  can significantly deviate from its empirical risk  $\mathbf{E}_\rho[r(\theta)]$  beyond a confidence interval determined by the complexity term  $\text{KL}(\rho\|\pi)$  and the expected confidence  $\mathbf{E}_\rho[\eta(\theta)]$ .

**Lemma A.1** (Catoni, 2007[5]). *For any positive real parameter  $\lambda > 0$ , any measurable function  $\eta : \Theta \rightarrow \mathbf{R}$ , and any prior probability distribution  $\pi$  on  $\Theta$ , we have:*

$$\begin{aligned} \mathbf{P} \left\{ \sup_{\rho} \lambda \mathbf{E}_{\rho}[R(\theta)] - \lambda \mathbf{E}_{\rho}[r_S(\theta)] - \mathbf{E}_{\rho}[\eta(\theta)] - \text{KL}(\rho\|\pi) \geq 0 \right\} \\ \leq \mathbf{E}_{\theta \sim \pi} \left[ \exp \left( \frac{\lambda^2}{N} g \left( \frac{\lambda}{N} \right) R(\theta)(1 - R(\theta)) - \eta(\theta) \right) \right]. \end{aligned} \quad (5)$$

Similarly,

$$\begin{aligned} \mathbf{P} \left\{ \sup_{\rho} \lambda \mathbf{E}_{\rho}[r_S(\theta)] - \lambda \mathbf{E}_{\rho}[R(\theta)] - \mathbf{E}_{\rho}[\eta(\theta)] - \text{KL}(\rho\|\pi) \geq 0 \right\} \\ \leq \mathbf{E}_{\theta \sim \pi} \left[ \exp \left( \frac{\lambda^2}{N} g \left( \frac{\lambda}{N} \right) R(\theta)(1 - R(\theta)) - \eta(\theta) \right) \right]. \end{aligned} \quad (6)$$

*Proof of Lemma A.1.* We begin with the following identity based on the Donsker–Varadhan variational representation of the KL divergence:

$$\sup_{\rho} \lambda \mathbf{E}_{\rho}[R(\theta) - r_S(\theta)] - \mathbf{E}_{\rho}[\eta(\theta)] - \text{KL}(\rho\|\pi) = \log \{ \mathbf{E}_{\theta \sim \pi} [\exp(\lambda[R(\theta) - r_S(\theta)] - \eta(\theta))] \}.$$

Taking probability explicitly with respect to the random draw of the training set  $S$ , we have:

$$\begin{aligned} \mathbf{P}_S \left\{ \sup_{\rho} \lambda \mathbf{E}_{\rho}[R(\theta) - r_S(\theta)] - \mathbf{E}_{\rho}[\eta(\theta)] - \text{KL}(\rho\|\pi) \geq 0 \right\} \\ = \mathbf{P}_S \{ \mathbf{E}_{\theta \sim \pi} [\exp(\lambda[R(\theta) - r_S(\theta)] - \eta(\theta))] \geq 1 \} \\ \leq \mathbf{E}_S [\mathbf{E}_{\theta \sim \pi} [\exp(\lambda[R(\theta) - r_S(\theta)] - \eta(\theta))]] \\ = \mathbf{E}_{\theta \sim \pi} [\mathbf{E}_S [\exp(\lambda[R(\theta) - r_S(\theta)] - \eta(\theta))]] \\ \leq \mathbf{E}_{\theta \sim \pi} \left[ \exp \left( \frac{\lambda^2}{N} g \left( \frac{\lambda}{N} \right) R(\theta)(1 - R(\theta)) - \eta(\theta) \right) \right]. \end{aligned}$$

The first inequality follows from Markov’s inequality applied to the random variable  $\mathbf{E}_{\theta \sim \pi} [\exp(\lambda[R(\theta) - r_S(\theta)] - \eta(\theta))]$ . The subsequent equality follows by Fubini’s theorem applied to the positive function  $(\theta, S) \mapsto \exp(\lambda[R(\theta) - r_S(\theta)] - \eta(\theta))$ . The final inequality results from Bernstein’s inequality applied to the random variables  $\ell(\theta; x_i, y_i)$ , where  $g(x) = (e^x - x - 1)/x^2$  is a standard auxiliary function arising from Bernstein’s inequality. This function explicitly provides refined control over the tail behavior through second-order moments and higher-order moment bounds.

For the reverse inequality, we similarly start from the Donsker–Varadhan variational representation of the KL divergence:

$$\sup_{\rho} \lambda \mathbf{E}_{\rho}[r_S(\theta) - R(\theta)] - \mathbf{E}_{\rho}[\eta(\theta)] - \text{KL}(\rho\|\pi) = \log \{ \mathbf{E}_{\theta \sim \pi} [\exp(\lambda[r_S(\theta) - R(\theta)] - \eta(\theta))] \}.$$

Taking probability explicitly with respect to the dataset  $S$ , we have:

$$\begin{aligned} \mathbf{P}_S \left\{ \sup_{\rho} \lambda \mathbf{E}_{\rho}[r_S(\theta) - R(\theta)] - \mathbf{E}_{\rho}[\eta(\theta)] - \text{KL}(\rho\|\pi) \geq 0 \right\} \\ = \mathbf{P}_S \{ \mathbf{E}_{\theta \sim \pi} [\exp(\lambda[r_S(\theta) - R(\theta)] - \eta(\theta))] \geq 1 \} \\ \leq \mathbf{E}_S [\mathbf{E}_{\theta \sim \pi} [\exp(\lambda[r_S(\theta) - R(\theta)] - \eta(\theta))]] \\ = \mathbf{E}_{\theta \sim \pi} [\mathbf{E}_S [\exp(\lambda[r_S(\theta) - R(\theta)] - \eta(\theta))]] \\ \leq \mathbf{E}_{\theta \sim \pi} \left[ \exp \left( \frac{\lambda^2}{N} g \left( \frac{\lambda}{N} \right) R(\theta)(1 - R(\theta)) - \eta(\theta) \right) \right]. \end{aligned}$$

□

495 We proceed to construct a PAC-Bayes bound with localized prior from Catoni's learning lemma A.1,  
 496 following Catoni's idea of localization.

497 *Proof of Theorem 3.1.*

**Localizing the Prior Using Population Risk Information.** We begin by explicitly choosing a confidence function  $\eta(\theta)$  as if we already had knowledge of the true risk  $R(\theta)$ :

$$\eta(\theta) = \frac{\lambda^2}{N} \kappa R(\theta) - \log \pi_{\exp(-\beta R(\bullet))}(\theta) + \log(\epsilon^{-1}), \text{ where } \kappa = g\left(\frac{\lambda}{N}\right).$$

498 The first term encodes our confidence from Bernstein's inequality that empirical risk closely approxi-  
 499 mates the population risk, simplifying the variance term  $R(\theta)[1 - R(\theta)]$  to  $R(\theta)$  for convenience.  
 500 The second term,  $-\log \pi_{\exp(-\beta R(\theta))}(\theta) = \beta R(\theta) + \log \pi[\exp(-\beta R(\theta))]$ , differentially penalizes  
 501 parameter regions based on their proximity to empirical optima: parameters far from the optimum  
 502 incur a looser penalty, while those near the optimum experience tighter localization. The final term  
 503 provides uniform confidence control. We define  $\kappa = g\left(\frac{\lambda}{N}\right)$  for notational simplicity.

Substitute  $\eta(\theta)$  into Eq. 5 in Lemma A.1, then relax the Bernstein bound  $\frac{\lambda^2}{N} g\left(\frac{\lambda}{N}\right) R(\theta)[1 - R(\theta)]$  in the exponent by  $\frac{\lambda^2}{N} g\left(\frac{\lambda}{N}\right) R(\theta)$  on the right-hand side. This relaxation effectively simplifies the expression involving  $\eta(\theta)$ , leaving only the term  $\epsilon$  explicitly on the right-hand side, thus yielding

$$\mathbf{P}_S \left\{ \sup_{\rho} \left[ (\lambda - \beta - \kappa \frac{\lambda^2}{N}) \mathbf{E}_{\rho}[R(\theta)] - \lambda \mathbf{E}_{\rho}[r(\theta)] - \text{KL}(\rho \| \pi) - \log \{ \pi[\exp(-\beta R(\theta))] \} \right] \geq \log(\epsilon^{-1}) \right\} \leq \epsilon,$$

504 i.e., with probability at least  $1 - \epsilon$ , the following bound holds for all posterior distributions  $\rho$ :

$$\mathbf{E}_{\rho}[R(\theta)] \leq (\lambda - \beta - \kappa \frac{\lambda^2}{N})^{-1} \{ \lambda \mathbf{E}_{\rho}[r(\theta)] + \text{KL}(\rho \| \pi) + \log \{ \pi[\exp(-\beta R(\theta))] \} + \log(\frac{1}{\epsilon}) \}. \quad (7)$$

**Bounding the Log-Partition Function via Empirical Risk.** The log-partition term  $\log \{ \pi[\exp(-\beta R(\theta))] \}$  in the above PAC-Bayes inequality cannot be optimized directly since it involves the unknown population risk  $R(\theta)$ . To resolve this, we aim to replace it with a bound involving the known empirical risk  $r_S(\theta)$ . To achieve this, we start by applying the Donsker-Varadhan variational formula to explicitly express the term in question as an expectation under the Gibbs posterior  $\pi_{\exp(-\beta R(\theta))}$ :

$$\log \{ \pi[\exp(-\beta R(\theta))] \} = -\beta \mathbf{E}_{\pi_{\exp(-\beta R(\theta))}}[R(\theta)] - \text{KL}(\pi_{\exp(-\beta R(\theta))} \| \pi).$$

The unknown expectation term  $\mathbf{E}_{\pi_{\exp(-\beta R(\theta))}}[R(\theta)]$  can be bounded in terms of the empirical risk using the inequality from Eq. 5 of Lemma A.1. With probability at least  $1 - \epsilon$ , we have:  $-\mathbf{E}_{\rho}[R(\theta)] \leq \frac{\lambda \mathbf{E}_{\rho}[r_S(\theta)] + \log(1/\epsilon)}{\lambda + \kappa \frac{\lambda^2}{N}}$ ,  $\forall \rho$ . Applying this inequality specifically to the Gibbs posterior  $\pi_{\exp(-\beta R(\theta))}$ , we obtain the following bound with probability at least  $1 - \epsilon$ :

$$-\beta \mathbf{E}_{\pi_{\exp(-\beta R(\theta))}}[R(\theta)] \leq \beta \mathbf{E}_{\pi_{\exp(-\beta R(\theta))}} \left[ -\frac{\lambda}{\lambda + \kappa \frac{\lambda^2}{N}} r_S(\theta) + \frac{1}{\lambda + \kappa \frac{\lambda^2}{N}} \log \frac{1}{\epsilon} \right].$$

505 Substituting this result back into the expression for the log-partition function yields, with probability  
 506 at least  $1 - \epsilon$ :

$$\begin{aligned} \log \{ \pi[\exp(-\beta R(\theta))] \} &= -\beta \mathbf{E}_{\pi_{\exp(-\beta R(\theta))}}[R(\theta)] - \text{KL}(\pi_{\exp(-\beta R(\theta))} \| \pi) \\ &\leq \beta \mathbf{E}_{\pi_{\exp(-\beta R(\theta))}} \left[ -\frac{\lambda}{\lambda + \kappa \frac{\lambda^2}{N}} r_S(\theta) + \frac{1}{\lambda + \kappa \frac{\lambda^2}{N}} \log \frac{1}{\epsilon} \right] - \text{KL}(\pi_{\exp(-\beta R(\theta))} \| \pi) \\ &\leq \sup_{\rho} \left\{ \frac{\beta}{1 + \kappa \frac{\lambda}{N}} \left( -\mathbf{E}_{\rho}[r_S(\theta)] + \frac{\log(1/\epsilon)}{\lambda} \right) - \text{KL}(\rho \| \pi) \right\} \\ &= \log \left\{ \pi \left[ \exp \left( -\frac{\beta}{1 + \kappa \frac{\lambda}{N}} r_S(\theta) \right) \right] \right\} + \frac{\beta}{\lambda + \kappa \frac{\lambda^2}{N}} \log \frac{1}{\epsilon}. \end{aligned} \quad (8)$$

Here, the second inequality follows directly from the definition of supremum by allowing the posterior distribution to vary freely. The final equality is obtained by re-applying the Donsker–Varadhan formula, now transforming the supremum back into a simpler log-partition function explicitly involving the empirical risk  $r_S(\theta)$ .

Applying a union bound to the earlier localized PAC-Bayes bound (Eq. 7) — specifically, using the deviation bound (Eq. 8) to control the log-partition term involving the unknown population risk — and introducing the substitution  $\xi = \frac{\beta}{\lambda(1+\kappa\frac{\lambda^2}{N})}$ , we obtain:

$$\mathbf{P}_S \left\{ \sup_{\rho} \left[ \left( (1-\xi)\lambda - (1+\xi)\kappa\frac{\lambda^2}{N} \right) \mathbf{E}_{\rho}[R(\theta)] - \lambda \mathbf{E}_{\rho}[r_S(\theta)] - \text{KL}(\rho\|\pi) - \log \mathbf{E}_{\pi}[\exp(-\xi\lambda r_S(\theta))] \right] \geq (1+\xi) \log(2\epsilon^{-1}) \right\} \leq \epsilon.$$

Equivalently, with probability at least  $1 - \epsilon$ , the following PAC-Bayes bound holds for all posterior distributions  $\rho$ :

$$\mathbf{E}_{\rho}[R(\theta)] \leq \frac{\lambda \mathbf{E}_{\rho}[r_S(\theta)] + \text{KL}(\rho\|\pi) + \log \{ \mathbf{E}_{\pi}[\exp(-\xi\lambda r_S(\theta))] \} + (1+\xi) \log(\frac{2}{\epsilon})}{(1-\xi)\lambda - (1+\xi)\kappa\frac{\lambda^2}{N}}.$$

**Simplifying with a Localized Prior.** Next, we use the following identity involving KL divergences:

$$\text{KL}(\rho\|\pi) + \log \mathbf{E}_{\pi}[\exp(-\xi\lambda r_S(\theta))] = \text{KL}(\rho\|\pi_{\exp(-\xi\lambda r_S)}) - \xi\lambda \mathbf{E}_{\rho}[r_S(\theta)],$$

where the distribution  $\pi_{\exp(-\xi\lambda r_S)}(\theta) \propto \pi(\theta) \exp(-\xi\lambda r_S(\theta))$  is a localized, data-dependent prior.

With this simplification, we obtain the following explicit PAC-Bayes bound: with probability at least  $1 - \epsilon$ , for all posterior distributions  $\rho$ ,

$$\mathbf{E}_{\rho}[R(\theta)] \leq \frac{(1-\xi)\lambda \mathbf{E}_{\rho}[r_S(\theta)] + \text{KL}(\rho\|\pi_{\exp(-\xi\lambda r_S)}) + (1+\xi) \log \frac{2}{\epsilon}}{(1-\xi)\lambda - (1+\xi)\kappa\frac{\lambda^2}{N}}. \quad (9)$$

The identity relating the KL divergences can be explicitly verified through the following derivation:

$$\begin{aligned} \text{KL}(\rho\|\pi) &= \mathbf{E}_{\rho} \left[ \log \frac{\rho(\theta)}{\pi(\theta)} \right] = \mathbf{E}_{\rho} \left[ \log \frac{\rho(\theta)/\pi_{\exp(-\xi\lambda r_S)}(\theta)}{\pi(\theta)/\pi_{\exp(-\xi\lambda r_S)}(\theta)} \right] \\ &= \mathbf{E}_{\rho} \left[ \log \frac{\rho(\theta)}{\pi_{\exp(-\xi\lambda r_S)}(\theta)} \right] + \mathbf{E}_{\rho} \left[ \log \frac{\pi(\theta) \exp(-\xi\lambda r_S(\theta)) / \mathbf{E}_{\pi}[\exp(-\xi\lambda r_S(\theta))]}{\pi(\theta)} \right] \\ &= \text{KL}(\rho\|\pi_{\exp(-\xi\lambda r_S)}) + \mathbf{E}_{\rho} \left[ \log \frac{\exp(-\xi\lambda r_S(\theta))}{\mathbf{E}_{\pi}[\exp(-\xi\lambda r_S(\theta))]} \right] \\ &= \text{KL}(\rho\|\pi_{\exp(-\xi\lambda r_S)}) - \xi\lambda \mathbf{E}_{\rho}[r_S(\theta)] - \log \mathbf{E}_{\pi}[\exp(-\xi\lambda r_S(\theta))]. \end{aligned}$$

**Uniformizing the Bound for Continuous Optimization.** To practically optimize the parameters  $\lambda$  and  $\xi$  using stochastic gradient descent (SGD), we first apply a union bound across discrete parameter grids. Specifically, we discretize the parameters onto finite sets, defining grids:  $\Lambda = \{2N\zeta^k : 0 \leq k \leq \lfloor \log_{\zeta^{-1}}(2N) \rfloor\}$  for  $\lambda$  with  $0 < \zeta < 1$ , and  $\Xi = \{\alpha^k : 1 \leq k \leq \lfloor \log_{\alpha^{-1}}(N) \rfloor\}$  for  $\xi$  with  $0 < \alpha < 1$ . We then evenly distribute the allowable failure probability  $\epsilon$  across all grid points, ensuring with probability at least  $1 - \epsilon$  that the PAC-Bayes bound simultaneously holds for every discrete combination of  $\lambda' \in \Lambda$  and  $\xi' \in \Xi$  satisfying the condition  $(1 - \xi')\lambda' - (1 + \xi')\kappa\frac{\lambda'^2}{N} > 0$ :

$$\mathbf{E}_{\rho}[R(\theta)] \leq \frac{(1 - \xi')\lambda' \mathbf{E}_{\rho}[r_S(\theta)] + \text{KL}(\rho\|\pi_{\exp(-\xi'\lambda' r_S)}) + (1 + \xi') \log \frac{2|\Lambda||\Xi|}{\epsilon}}{(1 - \xi')\lambda' - (1 + \xi')\kappa\frac{\lambda'^2}{N}}.$$

The factor  $|\Lambda||\Xi|$  explicitly accounts for the union bound over the discrete grids of  $\lambda'$  and  $\xi'$ .

Next, we relax these discrete conditions to continuous parameters  $\lambda \in [1, 2N]$  and  $\xi \in [0, 1]$  by selecting their nearest grid points  $\lambda' \in \Lambda$  and  $\xi' \in \Xi$  such that  $\lambda \leq \lambda' \leq \frac{\lambda}{\zeta}$  and  $\xi \leq \xi' \leq \frac{\xi}{\alpha}$ .

Thus, we obtain a continuous optimization-friendly PAC-Bayes bound: With probability at least  $1 - \epsilon$ , for all continuous parameters  $\lambda \in [1, 2N]$  and  $\xi \in [0, 1)$  satisfying the relaxed condition  $(1 - \frac{\xi}{\alpha})\frac{\lambda}{\xi} - (1 + \frac{\xi}{\alpha})\kappa\frac{(\frac{\lambda}{\xi})^2}{N} > 0$ , we have:

$$\mathbf{E}_\rho[R(\theta)] \leq \frac{(1 - \xi)\lambda \mathbf{E}_\rho[r_S(\theta)] + \text{KL}(\rho \| \pi_{\exp(-\xi\lambda r_S)}) + \left(1 + \frac{\xi}{\alpha}\right) \log \frac{2|\Lambda||\Xi|}{\epsilon}}{\left(1 - \frac{\xi}{\alpha}\right)\frac{\lambda}{\xi} - \left(1 + \frac{\xi}{\alpha}\right)\kappa\frac{(\frac{\lambda}{\xi})^2}{N}}.$$

519 This relaxation is crucial since it permits direct optimization of  $\lambda$  and  $\xi$  via gradient-based methods  
520 like SGD, making the bound highly practical for numerical implementations.

521 **Empirical Estimation via Importance Sampling and Monte Carlo Methods.** To numerically  
522 compute and optimize our PAC-Bayes bound, we explicitly introduce Monte Carlo estimates for each  
523 component of the derived bound:

Given posterior distribution samples  $\{\theta_i\}_{i=1}^K \sim \rho(\theta)$ , the empirical risk term  $\mathbf{E}_\rho[r_S(\theta)]$  is estimated as:

$$\widehat{\rho[r_S]} = \frac{1}{K} \sum_{i=1}^K r_S(\theta_i).$$

524 By Hoeffding's inequality, with probability at least  $1 - \epsilon$ , we have:  $\mathbf{E}_\rho[r_S(\theta)] \leq \widehat{\rho[r_S]} + \sqrt{\frac{\log(2/\epsilon)}{2K}}$ .

Similarly, we estimate the KL divergence between the posterior  $\rho(\theta)$  and the localized prior  $\pi_{\exp(-\xi\lambda r_S)}(\theta)$ :

$$\widehat{\text{KL}}_K(\rho \| \pi_{\exp(-\xi\lambda r_S)}) = \frac{1}{K} \sum_{i=1}^K \left( \log \frac{\rho(\theta_i)}{\pi(\theta_i)} + \xi\lambda r_S(\theta_i) \right) + \log \pi[\exp(-\xi\lambda r_S(\theta))],$$

where the log-partition function  $\log \pi[\exp(-\xi\lambda r_S(\theta))]$  is approximated via importance sampling, using posterior samples as the proposal distribution:

$$\log \pi[\widehat{\exp(-\xi\lambda r_S(\theta))}]_{\text{IS}} = \log \left( \frac{1}{K} \sum_{i=1}^K \frac{\pi(\theta_i) \exp(-\xi\lambda r_S(\theta_i))}{\rho(\theta_i)} \right).$$

525 Applying Hoeffding's inequality again, with probability at least  $1 - \epsilon$ , we have the following bound for  
526 the importance sampling estimate:  $\log \pi[\exp(-\xi\lambda r_S(\theta))] \leq \log \pi[\widehat{\exp(-\xi\lambda r_S(\theta))}]_{\text{IS}} + \sqrt{\frac{\log(2/\epsilon)}{2K}}$ .

527 By substituting these Monte Carlo estimates and their finite-sample corrections into our PAC-  
528 Bayes bound and applying union bound, we achieve a fully implementable empirical PAC-Bayes  
529 generalization bound, ready for optimization using gradient-based methods.

530 We have presented a PAC-Bayes generalization bound suitable for practical optimization. Beginning  
531 with Catoni's general PAC-Bayes lemma, we incorporated a localized, data-dependent prior to  
532 sharpen the bound, replaced unknown population risks with empirical approximations, and applied  
533 uniform discretization over hyperparameters to enable direct optimization via stochastic gradient  
534 descent. Finally, we introduced Monte Carlo and importance sampling methods for numerical  
535 estimation, providing an explicit, implementable approach for evaluating and enhancing neural  
536 network generalization performance within the PAC-Bayes framework.

537 □

## 538 Discussion: Optimality of the Gibbs Posterior

The empirical PAC-Bayes bound (Eq. 9) at its minimal can be expressed neatly as a difference of log-partition functions. Specifically, with probability at least  $1 - \epsilon$ , we have

$$\mathbf{E}_\rho[R(\theta)] \leq \frac{-\log \pi[\exp(-\lambda r_S(\theta))] + \log \pi[\exp(-\xi\lambda r_S(\theta))] + (1 + \xi) \log \frac{2}{\epsilon}}{(1 - \xi)\lambda - (1 + \xi)\kappa\frac{\lambda^2}{N}}.$$

539 To see this optimality, recall the Donsker-Varadhan variational formula, which states that the  
540 infimum of the objective  $\lambda \mathbf{E}_\rho[r_S(\theta)] + \text{KL}(\rho | \pi)$  over all posterior distributions  $\rho$  is precisely



541  $-\log \pi[\exp(-\lambda r_S(\theta))]$ . This infimum is uniquely attained by the Gibbs posterior distribution,  
 542 given explicitly by  $\rho^*(\theta) = \frac{\pi(\theta) \exp(-\lambda r_S(\theta))}{\mathbf{E}_\pi[\exp(-\lambda r_S(\theta))]}$ , parameterized by the inverse temperature  $\lambda$ . Substitut-  
 543 ing this optimal posterior  $\rho^*(\theta)$  into the PAC-Bayes bound directly yields the minimal achievable  
 544 bound, characterized by the difference-of-log-partition-functions form:  $-\log \pi[\exp(-\lambda r_S(\theta))] +$   
 545  $\log \pi[\exp(-\xi \lambda r_S(\theta))]$ .

#### 546 **Discussion: Bias of the Log-Sum-Exp Estimator and Integral Form Alternative**

547 The log-partition function  $\log \pi[\exp(-\xi \lambda r_S(\theta))]$  in our bound is practically esti-  
 548 mated using importance sampling with posterior samples:  $\log \pi[\exp(-\xi \lambda r_S(\theta))] \text{IS} =$   
 549  $\log \left( \frac{1}{K} \sum_{i=1}^K \frac{\pi(\theta_i) \exp(-\xi \lambda r_S(\theta_i))}{\rho(\theta_i)} \right)$ . This estimator, however, is biased due to Jensen's  
 550 inequality applied to the concave logarithm function. Specifically, since  $\mathbf{E}[\log(X)] \leq \log(\mathbf{E}[X])$ ,  
 551 taking the log after averaging inherently introduces negative bias. Thus, while consistent as  $K \rightarrow \infty$ ,  
 552 this estimator systematically underestimates the true log-partition function for finite sample sizes.

To obtain an unbiased alternative, we utilize the fundamental theorem of calculus. Observe that:

$$-\log \pi[\exp(-\lambda r_S(\theta))] + \log \pi[\exp(-\xi \lambda r_S(\theta))] = \int_{\xi \lambda}^{\lambda} \frac{d}{d\beta'} [-\log \pi(\exp(-\beta' r_S(\theta)))] d\beta'.$$

Evaluating the derivative inside explicitly, we have:

$$\frac{d}{d\beta'} [-\log \pi(\exp(-\beta' r_S(\theta)))] = \mathbf{E}_{\pi_{\exp(-\beta' r_S)}}[r_S(\theta)].$$

Thus, the integral form becomes:

$$-\log \pi[\exp(-\lambda r_S(\theta))] + \log \pi[\exp(-\xi \lambda r_S(\theta))] = \int_{\xi \lambda}^{\lambda} \mathbf{E}_{\pi_{\exp(-\beta' r_S)}}[r_S(\theta)] d\beta'.$$

Applying the substitution  $\beta' = \beta \lambda$ , we simplify to:

$$= \lambda \int_{\xi}^1 \mathbf{E}_{\pi_{\exp(-\beta \lambda r_S)}}[r_S(\theta)] d\beta.$$

To numerically estimate this integral form unbiasedly, we discretize the integral using a numerical quadrature rule with points  $\beta_j$   $j=1$  evenly spaced in  $[\xi, 1]$ . For each  $\beta_j$ , we draw samples  $\theta_{ij}$   $i=1$  independently from the corresponding Gibbs posterior distribution  $\pi_{\exp(-\beta_j \lambda r_S)}$ , and then form the Monte Carlo estimator:

$$\lambda \int_{\xi}^1 \mathbf{E}_{\pi_{\exp(-\beta \lambda r_S)}}[r_S(\theta)] d\beta = \frac{\lambda(1-\xi)}{J} \sum_{j=1}^J \frac{1}{K} \sum_{i=1}^K r_S(\theta_{ij}).$$

553 This estimator is unbiased by construction, as it directly estimates the expectation within the integral  
 554 without applying nonlinear transformations.

555 The log-sum-exp estimator requires only  $K$  samples from a single posterior, thus it is computationally  
 556 efficient but biased. The integral-based estimator requires sampling from  $J$  different Gibbs posteriors,  
 557 yielding a total of  $J \times K$  samples, thus it is unbiased but computationally more demanding. Choosing  
 558 between the two methods involves balancing the trade-off between estimator bias and computational  
 559 resources.

560 Compared to the log-sum-exp estimator, the integral form estimator directly estimates expected risks  
 561 at multiple intermediate Gibbs posteriors, avoiding logarithmic bias entirely. However, it requires  
 562 drawing samples from multiple Gibbs posteriors ( $J \times K$  total samples), thus increasing computational  
 563 cost significantly compared to the log-sum-exp method, which uses only  $K$  samples from a single  
 564 posterior. Choosing between the two involves a trade-off: the integral estimator is unbiased but  
 565 computationally heavier, whereas the log-sum-exp estimator is computationally efficient but biased.

## 566 A.2 Formal Statement and Proof of Theorem 3.2

We begin by briefly summarizing notation and key assumptions required for formally stating Theorem 3.2. Consider an  $(L + 1)$ -layer feedforward neural network  $f(\cdot, \theta)$  with parameter vector  $\theta \in \Theta \subseteq \mathbf{R}^{|\theta|}$ . The parameter  $\theta$  explicitly includes all layer-wise weights and biases, given by:

$$\theta = \{\mathbf{W}_l, \mathbf{b}_l : 1 \leq l \leq L + 1\},$$

where each layer  $l$  is computed as

$$\mathbf{x}_l(\mathbf{x}_{l-1}, \theta) = f_l(\mathbf{W}_l \mathbf{x}_{l-1} + \mathbf{b}_l), \quad l = 1, \dots, L, \quad \text{with } f_{L+1} \text{ being identity.}$$

567 We have a training dataset  $S = \{(x_i, y_i)\}_{i=1}^N$ , drawn independently and identically from the data-  
568 generating distribution  $D$ . Inputs are collected as  $\mathcal{X} = \{x_i\}_{i=1}^N$ , and outputs as  $\mathcal{Y} = \{y_i\}_{i=1}^N$ .

569 Assume a bounded loss function  $\ell(\theta; x, y) \in [0, 1]$ . We define the *population risk*  $R(\theta)$  and *empirical*  
570 *risk*  $r(\theta)$  explicitly as:  $R(\theta) = \mathbf{E}_{(x,y) \sim P}[\ell(\theta; x, y)]$  and  $r(\theta) = \frac{1}{N} \sum_{i=1}^N \ell(\theta; x_i, y_i)$ .

571 Next, consider a linearized approximation of the original neural network around initialization  $\theta_0$ :

$$f^{\text{lin}}(\cdot, \theta) = f(\cdot, \theta_0) + \nabla_{\theta} f(\cdot, \theta_0)(\theta - \theta_0).$$

572 Define an approximate loss  $\tilde{\ell}(\theta; x, y)$  based on this linearized model, with its corresponding *approximate*  
573 *population risk*  $\tilde{R}(\theta)$  and *approximate empirical risk*  $\tilde{r}(\theta)$  given explicitly by:

$$\tilde{R}(\theta) = \mathbf{E}_{(x,y) \sim P}[\tilde{\ell}(\theta; x, y)], \quad \tilde{r}(\theta) = \frac{1}{N} \sum_{i=1}^N \tilde{\ell}(\theta; x_i, y_i).$$

We explicitly define the *model approximation error*  $\epsilon_{\text{model}}(\theta)$  as the worst-case difference between the original loss and the approximate loss, satisfying uniformly:

$$|\ell(\theta; x, y) - \tilde{\ell}(\theta; x, y)| \leq \epsilon_{\text{model}}(\theta).$$

574 This quantity measures the approximation gap induced by linearizing the neural network.

We introduce prior and posterior distributions  $\pi(\theta)$  and  $\rho(\theta)$ , respectively. Gibbs-type posterior distributions are defined explicitly as:

$$\pi_{\exp(-\lambda r_S(\theta))}(\theta) \propto \pi(\theta) \exp(-\lambda r_S(\theta)), \quad \pi_{\exp(-\beta \tilde{R}(\theta))}(\theta) \propto \pi(\theta) \exp(-\beta \tilde{R}(\theta)),$$

for parameters  $\lambda, \beta > 0$ . The Kullback–Leibler divergence is denoted explicitly by:

$$\text{KL}(\rho \parallel \pi) = \int_{\Theta} \rho(\theta) \log \frac{\rho(\theta)}{\pi(\theta)} d\theta.$$

575 We explicitly assume the following standard conditions:

**(A1) (Gaussian Initialization and Bounded Inputs).** Each layer  $l \in \{1, \dots, L + 1\}$  has weights and biases initialized as independent Gaussian distributions:

$$\mathbf{W}_l \sim \mathcal{N}\left(0, \frac{\sigma_w^2}{n_{l-1}} \mathbf{I}\right), \quad \mathbf{b}_l \sim \mathcal{N}(0, \sigma_b^2 \mathbf{I}),$$

with input dimension  $n_0$ , hidden layer widths  $n_l$ , and inputs  $\mathbf{x}_0$  bounded or sub-Gaussian. There exist finite constants  $C_w, C_b, C_{x_0} > 0$ , such that with high probability:

$$\|\mathbf{W}_l\| \leq C_w \sigma_w \sqrt{\frac{n_l}{n_{l-1}}}, \quad \frac{\|\mathbf{b}_l\|}{\sqrt{n_l}} \leq C_b \sigma_b, \quad \frac{\|\mathbf{x}_0\|}{\sqrt{n_0}} \leq C_{x_0}.$$

**(A2) (Bounded Width Ratios).** Layer widths  $n_l$  maintain uniformly bounded ratios; explicitly, there exist constants  $c_{\min}, c_{\max} > 0$  such that:

$$c_{\min} \leq \frac{n_l}{n_{l'}} \leq c_{\max}, \quad \forall l, l', \quad \text{thus } n_l = O(n) \ (\forall l).$$

**(A3) (Positive Definiteness of Infinite-Width NTK).** Define explicitly the empirical Neural Tangent Kernel (NTK) at iteration  $t$  as:

$$\hat{\Theta}_t = \frac{1}{n} \nabla_{\theta} f(\mathcal{X}, \theta_t) \nabla_{\theta} f(\mathcal{X}, \theta_t)^{\top}.$$

Assume the infinite-width NTK limit  $\Theta = \lim_{n \rightarrow \infty} \hat{\Theta}_0$  is strictly positive definite, with eigenvalues bounded away from 0 and  $\infty$ . Explicitly, there exist constants  $0 < \lambda_{\min} \leq \lambda_{\max} < \infty$  such that:

$$\lambda_{\min} \mathbf{I}_N \preceq \Theta = \lim_{n \rightarrow \infty} \hat{\Theta}_0 \preceq \lambda_{\max} \mathbf{I}_N.$$

**(A4) (Bounded Activations and Derivatives).** Each layer activation function  $f_l$ ,  $l = 1, \dots, L$ , has explicitly bounded magnitude and bounded first and second derivatives:

$$|f_l(0)| < \infty, \quad \|f'_l\|_{\infty} < \infty, \quad \|f''_l\|_{\infty} < \infty.$$

**(A5) (Controlled Learning Rate).** Stochastic gradient descent parameter updates are given explicitly by:  $\theta_t = \theta_{t-1} - \eta \nabla_{\theta} r(\theta_{t-1})$ , with learning rate  $\eta = \eta_0/n$ , where the step-size factor  $\eta_0$  satisfies:

$$\eta_0 \leq \frac{2}{\lambda_{\min} + \lambda_{\max}},$$

strictly below the NTK stability threshold.

With this notation and under these assumptions, we formally state Theorem 3.2:

**Theorem 3.2** (PAC-Bayes Bound for Wide Networks, Formal). *Under assumptions (A1)–(A5), for any choice of regularization parameter  $\lambda > 0$ , localization parameter  $\xi \in [0, 1]$ , confidence level  $\varepsilon \in (0, 1)$ , and sufficiently large training size  $N$  satisfying  $0 < 1 - \frac{1}{1-\xi} g\left(\frac{\lambda}{N}\right) \frac{\lambda}{N} \leq 1$ , the following bound on the expected population risk under the Gibbs posterior distribution  $\pi_{\exp(-\lambda r(\theta))}$  induced by stochastic gradient descent holds with probability at least  $1 - \varepsilon$ :*

$$\mathbf{E}_{\pi_{\exp(-\lambda r)}}[R(\theta)] \leq \left( \left( 1 + \frac{1}{1-\xi} g\left(\frac{\lambda}{N}\right) \frac{\lambda}{N} \right) \mathbf{E}_{\rho}[\tilde{R}(\theta)] + \frac{1}{(1-\xi)\lambda} \left( \frac{C_{\text{KL}}}{n} + \log\left(\frac{2}{\varepsilon}\right) \right) \right) / \left( 1 - \frac{1}{1-\xi} g\left(\frac{\lambda}{N}\right) \frac{\lambda}{N} \right),$$

where  $g(x) = (\exp(x) - 1 - x)/x^2$  and  $C_{\text{KL}} > 0$  is a constant independent of network width  $n$  and training size  $N$ .

We start by stating and proving the following localized oracle PAC-Bayes bounds using proxy models. While our usage of this lemma is to show that as network width grows unbounded, a neural network trained from random initialization with stochastic gradient descent generalizes as well as its simpler linear approximation at initialization, these bounds extend to various deep learning scenarios where proxy or approximate models address challenges like non-differentiable metrics, complex loss landscapes, unlabeled data, knowledge distillation, unstable reinforcement signals, and differentiable relaxations of hard constraints. Our theorems build on Catoni’s localization idea but incorporate approximate losses, assuming the true loss is controlled by these approximations.

**Lemma A.2** (PAC-Bayes oracle bound with approximate population risk). *With previously defined notation, for any posterior distribution  $\rho(\theta)$ , prior  $\pi(\theta)$ , and inverse temperature  $\lambda > 0$ , the expected population risk under the Gibbs posterior  $\pi_{\exp(-\lambda r(\theta))}$  satisfies the following bound with probability at least  $1 - \varepsilon$  over the draw of the training sample  $S$ :*

$$\begin{aligned} \mathbf{E}_{\pi_{\exp(-\lambda r(\theta))}}[R(\theta)] &\leq \\ &\frac{\left( \lambda + \kappa \frac{\lambda^2}{N} \right) \mathbf{E}_{\rho} \left[ \tilde{R}(\theta) + \epsilon_{\text{model}}(\theta) \right] + \text{KL}(\rho \| \pi) + \log \mathbf{E}_{\pi} \left[ \exp(-\beta(\tilde{R}(\theta) - \epsilon_{\text{model}}(\theta))) \right] + \log \frac{2}{\varepsilon}}{\lambda - \beta - \kappa \frac{\lambda^2}{N}}. \end{aligned} \tag{10}$$

*Proof of Lemma A.2.* We begin by picking the same confidence function  $\eta(\theta)$  in the proof of Theorem 3.1 as if we already knew the true risk  $R(\theta)$ :

$$\eta(\theta) = \frac{\lambda^2}{N} \kappa R(\theta) - \log \pi_{\exp(-\beta R(\bullet))}(\theta) + \log(\epsilon^{-1}), \text{ where } \kappa = g\left(\frac{\lambda}{N}\right).$$

In this function, the first term encodes our certainty that the empirical risk  $r(\theta)$  is close to  $R(\theta)$ , effectively absorbing the Bernstein-type bound  $\frac{\lambda^2}{N} g\left(\frac{\lambda}{N}\right) R(\theta)[1 - R(\theta)]$  on the right-hand side of

the rare event in Eq. 5 in Lemma A.1. The second term allots a portion of the confidence budget proportionally to  $R(\theta)$ , controlled by a positive parameter  $\beta$  that dictates the “localization” strength. If  $R(\theta)$  is large—meaning  $\theta$  is far from a minimizer—we can afford a looser confidence interval because we care less about ensuring  $r(\theta) \approx R(\theta)$ . Conversely, if  $R(\theta)$  is small, we impose a tighter bound near the minimizer. The final term  $\log(\varepsilon^{-1})$  provides a uniform confidence shift in the tail event once we have accounted for the uncertainty in  $r(\theta)$  and in choosing  $\theta$ .

Although this choice of  $\eta(\theta)$  presupposes knowing  $R(\theta)$ , we eventually eliminate that assumption by relaxing  $R(\theta)$  with  $r(\theta)$  using the reverse bound from the same learning lemma.

Substitute  $\eta(\theta)$  into Eq. 5 in Lemma A.1 yields the following bound, which holds for all posterior distributions  $\rho$  with probability at least  $1 - \varepsilon$ :

$$\mathbf{E}_\rho[R(\theta)] \leq (\lambda - \beta - \kappa \frac{\lambda^2}{N})^{-1} \{ \lambda \mathbf{E}_\rho[r(\theta)] + \text{KL}(\rho \parallel \pi) + \log\{\pi[\exp(-\beta R(\theta))]\} + \log(\frac{1}{\varepsilon}) \}. \quad (7)$$

The right hand side of Eq. 7 is minimized at the Gibbs distribution  $\pi_{\exp(-\lambda r(\theta))}$ , in which case  $\inf_\rho \mathbf{E}_\rho[\lambda r(\theta)] + \text{KL}(\rho \parallel \pi) = -\sup_\rho \mathbf{E}_\rho[-\lambda r(\theta)] - \text{KL}(\rho \parallel \pi) = \log \mathbf{E}_{\pi_{\exp(-\lambda r(\theta))}}[\exp(-\lambda r(\theta))]$ :

$$\begin{aligned} \hat{\rho}_\lambda[R(\theta)] &\leq \left[ \lambda - \beta - \kappa \frac{\lambda^2}{N} \right]^{-1} \{ \lambda \hat{\rho}_\lambda[r(\theta)] + \mathcal{K}(\hat{\rho}_\lambda, \pi) + \log\{\pi[\exp(-\beta R(\theta))]\} + \log(\varepsilon^{-1}) \} \\ &= \inf_\rho \left[ \lambda - \beta - \kappa \frac{\lambda^2}{N} \right]^{-1} \{ \lambda \rho[r(\theta)] + \mathcal{K}(\rho, \pi) + \log\{\pi[\exp(-\beta R(\theta))]\} + \log(\varepsilon^{-1}) \} \\ &\leq \left[ \lambda - \beta - \kappa \frac{\lambda^2}{N} \right]^{-1} \{ \lambda \rho[r(\theta)] + \mathcal{K}(\rho, \pi) + \log\{\pi[\exp(-\beta R(\theta))]\} + \log(\varepsilon^{-1}) \}. \end{aligned}$$

To form a theoretical bound using the approximate risk  $\tilde{R}(\theta)$ , we need to upper-bound both  $\mathbf{E}_\rho[r(\theta)]$  and  $\log(\mathbf{E}_\pi[\exp(-\beta R(\theta))])$ . By approximation, we have

$$\log(\mathbf{E}_\pi[\exp(-\beta R(\theta))]) \leq \log\left(\mathbf{E}_\pi\left[\exp\left(-\beta(\tilde{R}(\theta) - \epsilon_{\text{model}}(\theta))\right)\right]\right).$$

Moreover, from Eq. 6 in Lemma A.1, with probability at least  $1 - \varepsilon$ :

$$\lambda \mathbf{E}_\rho[r(\theta)] \leq \left(\lambda + \kappa \frac{\lambda^2}{N}\right) \mathbf{E}_\rho[R(\theta)] + \log\left(\frac{1}{\varepsilon}\right) \leq \left(\lambda + \kappa \frac{\lambda^2}{N}\right) \mathbf{E}_\rho[\tilde{R}(\theta) + \epsilon_{\text{model}}(\theta)] + \log\left(\frac{1}{\varepsilon}\right).$$

By union bound, we get Eq. 10. Further using the identity

$$\begin{aligned} \text{KL}(\rho \parallel \pi) + \log\left(\mathbf{E}_\pi\left[\exp\left(-\beta(\tilde{R}(\theta) - \epsilon_{\text{model}}(\theta))\right)\right]\right) &= \\ \text{KL}\left(\rho \parallel \pi_{\exp(-\beta(\tilde{R}(\theta) - \epsilon_{\text{model}}(\theta)))}\right) - \beta \mathbf{E}_\rho[\tilde{R}(\theta) - \epsilon_{\text{model}}(\theta)], \end{aligned}$$

we obtain the localize oracle bound with approximate population risk: with probability at least  $1 - \varepsilon$ ,

$$\begin{aligned} \left(\lambda - \beta - \kappa \frac{\lambda^2}{N}\right) \mathbf{E}_{\pi_{\exp(-\lambda r)}}[R(\theta)] &\leq \left(\lambda + \kappa \frac{\lambda^2}{N}\right) \mathbf{E}_\rho[\tilde{R}(\theta) + \epsilon_{\text{model}}(\theta)] \\ &\quad + \text{KL}\left(\rho \parallel \pi_{\exp(-\beta(\tilde{R}(\theta) - \epsilon_{\text{model}}(\theta)))}\right) - \beta \mathbf{E}_\rho[\tilde{R}(\theta) - \epsilon_{\text{model}}(\theta)] + \log\left(\frac{2}{\varepsilon}\right). \end{aligned}$$

A special case is when  $\epsilon_{\text{model}}(\theta)$  is constant. In that case:

$$\begin{aligned} \mathbf{E}_{\pi_{\exp(-\lambda r)}}[R(\theta)] &\leq \left(\lambda - \beta - \kappa \frac{\lambda^2}{N}\right)^{-1} \cdot \\ &\quad \left\{ \left(\lambda + \kappa \frac{\lambda^2}{N}\right) \mathbf{E}_\rho[\tilde{R}(\theta)] + \text{KL}(\rho \parallel \pi) + \log\left(\mathbf{E}_\pi\left[\exp(-\beta \tilde{R}(\theta))\right]\right) + \left(\lambda + \kappa \frac{\lambda^2}{N} + \beta\right) \epsilon_{\text{model}} + \log\left(\frac{2}{\varepsilon}\right) \right\}. \end{aligned}$$

617

□

With Lemma A.2, we prove Theorem 3.2 in the following steps. Throughout, we apply triangle inequalities, Cauchy–Schwarz, product–difference identities, and random matrix bounds under assumptions (A1)–(A5).

**(i) Bounding activation and its sensitivity.** A forward recursion for each layer  $l$  inductively shows that  $\mathbf{x}_l(\theta) = O(\sqrt{n_l})$  and  $\|\mathbf{x}_l(\theta) - \mathbf{x}_l(\tilde{\theta})\| \leq O(\sqrt{n_l} \|\theta - \tilde{\theta}\|)$ . A similar backward recursion yields  $\delta_l(\theta) = \partial_{\mathbf{x}_l} \mathbf{x}_{L+1}(\theta) = O(1)$  and  $\|\delta_l(\theta) - \delta_l(\tilde{\theta})\| = O(\|\theta - \tilde{\theta}\|)$ .

**(ii) Bounding Jacobian and NTK.** By applying the chain rule to each activation-sensitivity product, one obtains  $\|\nabla_{\theta} f(\mathcal{X}, \theta)\| = O(\sqrt{n})$  and  $\|\nabla_{\theta} f(\mathcal{X}, \theta) - \nabla_{\theta} f(\mathcal{X}, \tilde{\theta})\| = O(\sqrt{n} \|\theta - \tilde{\theta}\|)$ . Expressing the empirical NTK  $\hat{\Theta}_t$ , the parameter iterate  $\theta_t$ , and the risk  $r(\theta)$  in terms of the same activation-sensitivity-Jacobian expansions, and then iterating over SGD steps, shows  $\|\hat{\Theta}_t - \hat{\Theta}_0\| = O(\frac{1}{\sqrt{n}})$ ,  $\|\theta_t - \theta_0\| = O(\frac{1}{\sqrt{n}})$ , and  $\|f(\mathcal{X}, \theta_t) - \mathcal{Y}\| \leq (1 - \frac{\eta_0 \lambda_{\min}}{3})^t R_0$ .

**(iii) Comparing network vs. linearized updates.** By expanding  $f(\theta_t) - f^{\text{lin}}(\theta_t)$  in terms of  $\hat{\Theta}_t - \hat{\Theta}_0$  and  $f(\theta_{t-1}) - f^{\text{lin}}(\theta_{t-1})$  and then telescoping, we obtain  $\|f(\theta_t) - f^{\text{lin}}(\theta_t)\| = O(\frac{t}{\sqrt{n}} (1 - \frac{\eta_0 \lambda_{\min}}{3})^t)$ . A parallel argument in parameter space shows  $\|\theta_t - \theta_t^{\text{lin}}\| = O(\frac{1}{n})$ .

**(iv) Bounding KL divergence between original and linearized learning.** Although  $\theta_t$  is not strictly Gaussian, each small Gaussian increment can be compared to that of  $\theta_t^{\text{lin}}$  via the chain rule for KL divergence. This requires bounding log-det ratios of covariance updates (through log-matrix expansions) and bounding trace terms involving the precision matrices and the second-moment difference. Both steps rely on the empirical NTK converging to a strictly positive-definite limit, yielding  $\text{KL}(p_t \| p_t^{\text{lin}}) \leq O(\frac{1}{n})$ .

**(v) Bounding complexity in theoretical PAC-Bayes.** Since the model approximation penalty  $\frac{1}{2} \|f(\theta_t) - f^{\text{lin}}(\theta_t)\|^2$  and the KL divergence  $D_{\text{KL}}(\rho \| \pi_{\exp(-\beta \tilde{R})})$  are both  $O(\frac{1}{n})$ , combining these with the  $\frac{1}{N}$  sample-size term completes the proof of rates on the order of  $\frac{1}{n}$  (width) and  $\frac{1}{N}$  (data).

We now formalize the five-step argument outlined above. Let  $\theta_0$  denote the random initialization of the network parameters, and let  $\theta_t$  be the parameter iterate after  $t$  steps of stochastic gradient descent (SGD). Define the linearized network around  $\theta_0$  by

$$f^{\text{lin}}(\mathcal{X}, \theta) = f(\mathcal{X}, \theta_0) + \nabla_{\theta} f(\mathcal{X}, \theta_0) (\theta - \theta_0),$$

and let  $\theta_t^{\text{lin}}$  be the corresponding parameter iterate from gradient descent on  $f^{\text{lin}}$ , with the same initialization and step size. We will show:

$$\|\theta_t - \theta_t^{\text{lin}}\| = O\left(\frac{1}{n}\right), \quad \|f(\theta_t) - f^{\text{lin}}(\theta_t)\| = O\left(\frac{1}{\sqrt{n}}\right), \quad \text{and} \quad \text{KL}(\rho \| \pi_{\exp(-\beta \tilde{R})}) = O\left(\frac{1}{n}\right)$$

and then apply the PAC-Bayes bound to conclude.

*Proof.* Before proving Step (i), we establish high-probability bounds on weights, biases, and inputs implied by assumption (A1). Each weight matrix  $\mathbf{W}_l$  and bias vector  $\mathbf{b}_l$  is drawn from a scaled Gaussian distribution, and inputs  $\mathbf{x}_0$  are either bounded or sub-Gaussian. Consequently, with high probability  $1 - \varepsilon_l$ , we have:

$$\|\mathbf{W}_l\| \leq C_w \sigma_w \sqrt{\frac{n_l}{n_{l-1}}}, \quad \|\mathbf{b}_l\| \leq C_b \sigma_b \sqrt{n_l},$$

for constants  $C_w, C_b > 0$ , provided  $n_l \geq -\log \varepsilon_l$  and  $\frac{n_l}{n_{l-1}}$  is bounded. Likewise, the input norm satisfies  $\|\mathbf{x}_0\| \leq \sqrt{n_0} C_{x_0}$ , or with probability  $1 - \varepsilon_0$  in the sub-Gaussian case.

In practice, such input conditions are met through preprocessing (e.g., centering, rescaling, or clipping). Applying a union bound across all layers, we conclude that-with probability at least  $1 - \sum_l \varepsilon_l$  and for sufficiently large  $n_l$ -the following initialization bounds hold simultaneously:

$$\|\mathbf{W}_l\| \leq C_w \sigma_w \sqrt{\frac{n_l}{n_{l-1}}}, \quad \frac{1}{\sqrt{n_l}} \|\mathbf{b}_l\| \leq C_b \sigma_b, \quad \frac{1}{\sqrt{n_0}} \|\mathbf{x}_0\| \leq C_{x_0}$$

649 **(i) Bounding activations and their sensitivities.**

650 Starting from  $n_0^{-1/2} \|\mathbf{x}_0\| \leq C_{x_0}$ , we can recursively bound  $n_{l+1}^{-1/2} \|\mathbf{x}_{l+1}\| \leq C_{x_{l+1}}$  with  
 651  $C_{x_{l+1}} = \|f'\|_\infty (C_w C_{x_l} \sigma_w + C_b \sigma_b) + |f(0)|$ :

$$\begin{aligned} \|\mathbf{x}_{l+1}\| &= \|f_{l+1}(\mathbf{W}_{l+1} \mathbf{x}_l + \mathbf{b}_{l+1})\| \leq \|f'\|_\infty \cdot (\|\mathbf{W}_{l+1} \mathbf{x}_l + \mathbf{b}_{l+1}\|) + \sqrt{n_{l+1}} |f(0)| \\ &\leq \|f'\|_\infty (\|\mathbf{W}_{l+1}\| \cdot \|\mathbf{x}_l\| + \|\mathbf{b}_{l+1}\|) + \sqrt{n_{l+1}} |f(0)| \\ &\leq \|f'\|_\infty \left( C_w \sigma_w \sqrt{n_{l+1}/n_l} \cdot C_{x_l} \sqrt{n_l} + C_b \sigma_b \sqrt{n_{l+1}} \right) + \sqrt{n_{l+1}} |f(0)| \\ &= \sqrt{n_{l+1}} (\|f'\|_\infty (C_w C_{x_l} \sigma_w + C_b \sigma_b) + |f(0)|). \end{aligned}$$

652 Starting from  $n_0^{-1/2} \|\mathbf{x}_0(\theta) - \mathbf{x}_0(\tilde{\theta})\| = 0 \leq C_{dx_0} \|\theta - \tilde{\theta}\|$ , we can recur-  
 653 sively bound  $n_{l+1}^{-1/2} \|\mathbf{x}_{l+1}(\mathbf{x}_0, \theta) - \mathbf{x}_{l+1}(\mathbf{x}_0, \tilde{\theta})\| \leq C_{dx_{l+1}} \|\theta - \tilde{\theta}\|$  with  $C_{dx_{l+1}} =$   
 654  $\|f'\|_\infty (C_{dx_l} C_w \sigma_w + C_{x_l} \sqrt{n_l/n_{l+1}} + 1/\sqrt{n_{l+1}})$ :

$$\begin{aligned} \|\mathbf{x}_{l+1}(\mathbf{x}_0, \theta) - \mathbf{x}_{l+1}(\mathbf{x}_0, \tilde{\theta})\| &= \|f(\mathbf{W}_{l+1} \mathbf{x}_l(\mathbf{x}_0, \theta) + \mathbf{b}_{l+1}) - f(\tilde{\mathbf{W}}_{l+1} \mathbf{x}_l(\mathbf{x}_0, \tilde{\theta}) + \tilde{\mathbf{b}}_{l+1})\| \\ &\leq \|f'\|_\infty \cdot \|(\mathbf{W}_{l+1} \cdot \mathbf{x}_l(\mathbf{x}_0, \theta) + \mathbf{b}_{l+1}) - (\tilde{\mathbf{W}}_{l+1} \cdot \mathbf{x}_l(\mathbf{x}_0, \tilde{\theta}) + \tilde{\mathbf{b}}_{l+1})\| \\ &\leq \|f'\|_\infty \cdot (\|\mathbf{W}_{l+1}\| \cdot \|\mathbf{x}_l(\mathbf{x}_0, \theta) - \mathbf{x}_l(\mathbf{x}_0, \tilde{\theta})\| + \|\mathbf{W}_{l+1} - \tilde{\mathbf{W}}_{l+1}\| \cdot \|\mathbf{x}_l(\mathbf{x}_0, \tilde{\theta})\| + \|\mathbf{b}_{l+1} - \tilde{\mathbf{b}}_{l+1}\|) \\ &\leq \|f'\|_\infty \cdot (C_w \sigma_w \sqrt{n_{l+1}/n_l} \cdot C_{dx_l} \sqrt{n_l} + C_{x_l} \sqrt{n_l} + 1) \|\theta - \tilde{\theta}\| \\ &= \sqrt{n_{l+1}} \|\theta - \tilde{\theta}\| \cdot \|f'\|_\infty (C_{dx_l} C_w \sigma_w + C_{x_l} \sqrt{n_l/n_{l+1}} + 1/\sqrt{n_{l+1}}). \end{aligned}$$

655 Let  $\delta_l(\theta) = \partial_{\mathbf{x}_l} \mathbf{x}_{L+1}(\theta)$ , Starting from  $\|\delta_{L+1}\| \leq C_{\delta_{L+1}}$ , we can recursively bound  $\|\delta_l\| \leq C_{\delta_l}$  with  
 656  $C_{\delta_l} = C_{\delta_{l+1}} C_w \sigma_w n_{l+1}/n_l$ :

$$\begin{aligned} \|\delta_l(\mathbf{x}_0, \theta)\| &= \|\delta_{l+1}(\mathbf{x}_0, \theta) \mathbf{W}_{l+1}\| \leq \|\delta_{l+1}(\mathbf{x}_0, \theta)\| \cdot \|\mathbf{W}_{l+1}\| = C_{\delta_{l+1}} \cdot C_w \sigma_w \sqrt{\frac{n_{l+1}}{n_l}} \\ &= \left( C_{\delta_{l+1}} C_w \sigma_w \sqrt{\frac{n_{l+1}}{n_l}} \right). \end{aligned}$$

657 Starting from  $\|\delta_{L+1}(\mathbf{x}_0, \theta) - \delta_{L+1}(\mathbf{x}_0, \tilde{\theta})\| = 0 \leq C_{d\delta_{L+1}} \|\theta - \tilde{\theta}\|$ , we can recursively bound

658  $\|\delta_l(\mathbf{x}_0, \theta) - \delta_l(\mathbf{x}_0, \tilde{\theta})\| \leq C_{d\delta_l} \|\theta - \tilde{\theta}\|$ , where  $C_{d\delta_l} = C_{d\delta_{l+1}} C_w \sigma_w \sqrt{\frac{n_{l+1}}{n_l}} + C_{\delta_{l+1}}$ :

$$\begin{aligned} \|\delta_l(\mathbf{x}_0, \theta) - \delta_l(\mathbf{x}_0, \tilde{\theta})\| &= \|\delta_{l+1}(\mathbf{x}_0, \theta) \mathbf{W}_{l+1} - \delta_{l+1}(\mathbf{x}_0, \tilde{\theta}) \tilde{\mathbf{W}}_{l+1}\| \\ &\leq \|(\delta_{l+1}(\mathbf{x}_0, \theta) - \delta_{l+1}(\mathbf{x}_0, \tilde{\theta})) \mathbf{W}_{l+1}\| + \|\delta_{l+1}(\mathbf{x}_0, \tilde{\theta}) (\mathbf{W}_{l+1} - \tilde{\mathbf{W}}_{l+1})\| \\ &\leq C_{d\delta_{l+1}} \|\theta - \tilde{\theta}\| \cdot C_w \sigma_w \sqrt{\frac{n_{l+1}}{n_l}} + C_{\delta_{l+1}} \cdot \|\theta - \tilde{\theta}\| \\ &= \|\theta - \tilde{\theta}\| \cdot \left( C_{d\delta_{l+1}} C_w \sigma_w \sqrt{\frac{n_{l+1}}{n_l}} + C_{\delta_{l+1}} \right). \end{aligned}$$

659 Thus, under the same union bound of events for  $\|\mathbf{W}_l\|, n_l^{-1/2} \|\mathbf{b}_l\|, n_0^{-1/2} \|\mathbf{x}_0\|$ , we have:

$$\begin{aligned} n_l^{-1/2} \|\mathbf{x}_l\| &\leq C_{x_l}, \quad n_l^{-1/2} \|\mathbf{x}_l(\mathbf{x}_0, \theta) - \mathbf{x}_l(\mathbf{x}_0, \tilde{\theta})\| \leq C_{dx_l} \|\theta - \tilde{\theta}\|, \\ \|\delta_l\| &\leq C_{\delta_l}, \quad \|\delta_l(\mathbf{x}_0, \theta) - \delta_l(\mathbf{x}_0, \tilde{\theta})\| \leq C_{d\delta_l} \|\theta - \tilde{\theta}\|. \end{aligned}$$

660 **(ii) Bounding the network Jacobian and empirical NTK.**

661 The Jacobian of network output with respect to the parameters can be bounded by

$$\begin{aligned}
662 \quad & (\max_l n_l)^{-1/2} \|\partial_{\theta} \mathbf{x}_{L+1}\|_F \leq C_J, \text{ where } C_J = \|f'\|_{\infty} \sqrt{\sum_l \frac{n_{l-1}}{\max_l n_l} C_{\delta_l}^2 C_{\mathbf{x}_{l-1}}^2 + \frac{C_{\delta_l}^2}{\max_l n_l}}: \\
& \|\partial_{\theta} \mathbf{x}_{L+1}\|_F^2 \\
& = \sum_l \|(\partial_{\mathbf{x}_l} \mathbf{x}_{L+1}) \text{diag}(f') (\partial_{\mathbf{w}_l} \mathbf{W}_l \mathbf{x}_{l-1} + \mathbf{b}_l)\|_F^2 + \|(\partial_{\mathbf{x}_l} \mathbf{x}_{L+1}) \text{diag}(f') (\partial_{\mathbf{b}_l} \mathbf{W}_l \mathbf{x}_{l-1} + \mathbf{b}_l)\|_F^2 \\
& \leq \sum_l \|\delta_l\|_F^2 \|f'\|_{\infty}^2 \|\mathbf{x}_{l-1}\|_F^2 + \|\delta_l\|_F^2 \|f'\|_{\infty}^2 = \sum_l C_{\delta_l}^2 \cdot \|f'\|_{\infty}^2 \cdot n_{l-1} C_{\mathbf{x}_{l-1}}^2 + C_{\delta_l}^2 \cdot \|f'\|_{\infty}^2 \\
& = \max_l n_l \cdot \|f'\|_{\infty}^2 \sum_l \frac{n_{l-1}}{\max_l n_l} C_{\delta_l}^2 C_{\mathbf{x}_{l-1}}^2 + \frac{C_{\delta_l}^2}{\max_l n_l}
\end{aligned}$$

663 The difference of the Jacobians can be bounded by  $(\max_l n_l)^{-1/2} \|\partial_{\theta} \mathbf{x}_{L+1} - \partial_{\tilde{\theta}} \tilde{\mathbf{x}}_{L+1}\|_F \leq$   
664  $C_{dJ} \|\theta - \tilde{\theta}\|$ , where  $C_{dJ} = \sqrt{\sum_l \frac{n_{l-1}}{\max_l n_l} (C_{d\delta_l} C_{x_{l-1}} + C_{\delta_l} C_{x_l})^2 + \frac{1}{\max_l n_l} C_{d\delta_l}^2}$ :

$$\begin{aligned}
& \|\partial_{\theta} \mathbf{x}_{L+1} - \partial_{\tilde{\theta}} \tilde{\mathbf{x}}_{L+1}\|_F^2 \\
& = \sum_l \left\| (\partial_{\mathbf{x}_l} \mathbf{x}_{L+1}) \text{diag}(f'(\mathbf{h}_l)) (\partial_{\mathbf{w}_l} \mathbf{h}_l) - (\partial_{\tilde{\mathbf{x}}_l} \tilde{\mathbf{x}}_{L+1}) \text{diag}(f'(\tilde{\mathbf{h}}_l)) (\partial_{\tilde{\mathbf{w}}_l} \tilde{\mathbf{h}}_l) \right\|_F^2 \\
& \quad + \left\| (\partial_{\mathbf{x}_l} \mathbf{x}_{L+1}) \text{diag}(f'(\mathbf{h}_l)) (\partial_{\mathbf{b}_l} \mathbf{h}_l) - (\partial_{\tilde{\mathbf{x}}_l} \tilde{\mathbf{x}}_{L+1}) \text{diag}(f'(\tilde{\mathbf{h}}_l)) (\partial_{\tilde{\mathbf{b}}_l} \tilde{\mathbf{h}}_l) \right\|_F^2 \\
& = \sum_l \left\| \delta_l(\mathbf{x}_0, \theta) \text{diag}(f'(\mathbf{h}_l)) \mathbf{x}_{l-1}(\mathbf{x}_0, \theta) - \delta_l(\mathbf{x}_0, \tilde{\theta}) \text{diag}(f'(\tilde{\mathbf{h}}_l)) \mathbf{x}_{l-1}(\mathbf{x}_0, \tilde{\theta}) \right\|_F^2 + \left\| \delta_l(\mathbf{x}_0, \theta) \text{diag}(f'(\mathbf{h}_l)) - \delta_l(\mathbf{x}_0, \tilde{\theta}) \text{diag}(f'(\tilde{\mathbf{h}}_l)) \right\|_F^2 \\
& \leq \sum_l \left( \|\delta_l(\mathbf{x}_0, \theta) - \delta_l(\mathbf{x}_0, \tilde{\theta})\| \cdot \|f'(\mathbf{h}_l)\| \cdot \|\mathbf{x}_{l-1}(\mathbf{x}_0, \theta)\| + \|\delta_l(\mathbf{x}_0, \tilde{\theta})\| \cdot \|f'(\mathbf{h}_l) - f'(\tilde{\mathbf{h}}_l)\| \cdot \|\mathbf{x}_{l-1}(\mathbf{x}_0, \theta)\| \right. \\
& \quad \left. + \|\delta_l(\mathbf{x}_0, \tilde{\theta})\| \cdot \|f'(\tilde{\mathbf{h}}_l)\| \cdot \|\mathbf{x}_{l-1}(\mathbf{x}_0, \theta) - \mathbf{x}_{l-1}(\mathbf{x}_0, \tilde{\theta})\| \right)^2 + \left( \|\delta_l(\mathbf{x}_0, \theta) - \delta_l(\mathbf{x}_0, \tilde{\theta})\|_F \cdot \|f'(\mathbf{h}_l)\|_F + \|\delta_l(\mathbf{x}_0, \tilde{\theta})\|_F \cdot (\|f'(\mathbf{h}_l)\|_F - \|f'(\tilde{\mathbf{h}}_l)\|_F) \right)^2 \\
& \leq \sum_l (C_{d\delta_l} \|\theta - \tilde{\theta}\| \cdot \|f'\|_{\infty} \cdot \sqrt{n_{l-1}} C_{x_{l-1}} + C_{\delta_l} \cdot \|f''\|_{\infty} \|\theta - \tilde{\theta}\|_2 \cdot \sqrt{n_{l-1}} C_{x_{l-1}} + C_{\delta_l} \cdot \|f'\|_{\infty} \cdot C_{x_l} \sqrt{n_{l-1}} \|\theta - \tilde{\theta}\|)^2 \\
& \quad + (C_{d\delta_l} \|\theta - \tilde{\theta}\| \cdot \|f'\|_{\infty} + C_{\delta_l} \cdot \|f''\|_{\infty} \|\theta - \tilde{\theta}\|)^2 \\
& \leq \max_l n_l \cdot \|\theta - \tilde{\theta}\|^2 \sum_l \frac{n_{l-1}}{\max_l n_l} (C_{d\delta_l} C_{x_{l-1}} + C_{\delta_l} C_{x_l})^2 + \frac{1}{\max_l n_l} C_{d\delta_l}^2
\end{aligned}$$

665 Consequently, with high probability, the Frobenius norm of the network's Jacobian (scaled by  
666  $1/\sqrt{\max_l n_l}$ ) is bounded by a constant  $C_J$ , and the difference of these scaled Jacobians is Lipschitz  
667 in  $\theta$  with Lipschitz constant  $C_{dJ}$ . Equivalently, unscaled, both the Jacobian and the Lipschitz constant  
668 scale on the order of  $\sqrt{\max_l n_l}$ , where  $\max_l n_l$  denotes the network's width. Formally,

$$(\max_l n_l)^{-1/2} \|\partial_{\theta} \mathbf{x}_{L+1}\|_F \leq C_J, \quad (\max_l n_l)^{-1/2} \left\| \partial_{\theta} \mathbf{x}_{L+1}(\mathbf{x}_0, \theta) - \partial_{\tilde{\theta}} \mathbf{x}_{L+1}(\mathbf{x}_0, \tilde{\theta}) \right\|_F \leq C_{dJ} \|\theta - \tilde{\theta}\|.$$

669 Under the mean-squared error (MSE) objective, one iteration of gradient descent updates

$$\theta_{t+1} = \theta_t - \eta \nabla_{\theta} f(\mathcal{X}, \theta_t)^{\top} (f(\mathcal{X}, \theta_t) - \mathcal{Y}).$$

670 Since  $\hat{\Theta}_t = \frac{1}{n} \nabla_{\theta} f(\mathcal{X}, \theta_t) \nabla_{\theta} f(\mathcal{X}, \theta_t)^{\top}$ , we have

$$f(\mathcal{X}, \theta_{t+1}) - f(\mathcal{X}, \theta_t) = -\eta \nabla_{\theta} f(\mathcal{X}, \theta_t) \nabla_{\theta} f(\theta_t)^{\top} (f(\mathcal{X}, \theta_t) - \mathcal{Y}) = -\eta_0 \hat{\Theta}_t (f(\mathcal{X}, \theta_t) - \mathcal{Y}).$$

671 If  $\hat{\Theta}_t$  stays close to a positive-definite limit  $\Theta$ , this induces a contraction factor  $\|I - \eta_0 \hat{\Theta}_t\| \leq$   
672  $1 - \frac{\eta_0 \lambda_{\min}}{3}$ . Hence the residue decreases exponentially in training step

$$\|f(\mathcal{X}, \theta_t) - \mathcal{Y}\| \leq \left(1 - \frac{\eta_0 \lambda_{\min}}{3}\right)^t \|f(\mathcal{X}, \theta_0) - \mathcal{Y}\|.$$

673 It also follows that  $\|\theta_t - \theta_0\| \leq C_J \frac{1}{\sqrt{n}} \frac{3}{\lambda_{\min}} \|f(\mathcal{X}, \theta_0) - \mathcal{Y}\|$  by summer over parameter steps  $t$ :

$$\|\theta_{t+1} - \theta_t\| \leq \frac{\eta_0}{n} \|\nabla_{\theta} f(\mathcal{X}, \theta_t)\| \|f(\mathcal{X}, \theta_t) - \mathcal{Y}\| \leq \eta_0 C_J \frac{1}{\sqrt{n}} \left(1 - \frac{\eta_0 \lambda_{\min}}{3}\right)^t \|f(\mathcal{X}, \theta_0) - \mathcal{Y}\|.$$

Throughout the training, the distance of the empirical NTK from its initialization is controlled by  
 $\left\| \hat{\Theta}_0 - \hat{\Theta}_t \right\|_F \leq \frac{6C_J^2 C_{dJ}}{\lambda_{\min}} \|f(\mathcal{X}, \theta_0) - \mathcal{Y}\| \frac{1}{\sqrt{n}}$ , where

$$\begin{aligned} \left\| \hat{\Theta}_0 - \hat{\Theta}_t \right\|_F &= \frac{1}{n} \left\| \nabla_{\theta} f(\mathcal{X}, \theta_0) \nabla_{\theta} f(\mathcal{X}, \theta_0)^{\top} - \nabla_{\theta} f(\mathcal{X}, \theta_t) \nabla_{\theta} f(\mathcal{X}, \theta_t)^{\top} \right\|_F \\ &\leq \frac{1}{n} \left( \left\| \nabla_{\theta} f(\mathcal{X}, \theta_0) \right\| \left\| \nabla_{\theta} f(\mathcal{X}, \theta_0)^{\top} - \nabla_{\theta} f(\mathcal{X}, \theta_t)^{\top} \right\| + \left\| \nabla_{\theta} f(\mathcal{X}, \theta_t) - \nabla_{\theta} f(\mathcal{X}, \theta_0) \right\| \left\| \nabla_{\theta} f(\mathcal{X}, \theta_t)^{\top} \right\| \right) \\ &\leq 2C_J C_{dJ} \|\theta_0 - \theta_t\|_2 \leq \frac{6C_J^2 C_{dJ}}{\lambda_{\min}} \|f(\mathcal{X}, \theta_0) - \mathcal{Y}\| \frac{1}{\sqrt{n}}. \end{aligned}$$

### (iii) Comparing the network vs. linearized updates.

In what follows, we characterize the gap between the network's prediction error  
 $g(\theta_{t+1}) = f(\mathcal{X}, \theta_{t+1}) - \mathcal{Y}$  and the prediction error of its linear approximation at initialization  
 $g^{\text{lin}}(\theta_{t+1}) = f^{\text{lin}}(\mathcal{X}, \theta_{t+1}) - \mathcal{Y}$  by examining how the gap at each previous training step accumulates  
 throughout training. Our goal is to bound this gap in terms of the network width and the training step.

$$\begin{aligned} &g^{\text{lin}}(\theta_{t+1}) - g(\theta_{t+1}) \\ &= \left[ g^{\text{lin}}(\theta_t) - \eta_0 \hat{\Theta}_0 g^{\text{lin}}(\theta_t) \right] - \left[ g(\theta_t) - \eta_0 \hat{\Theta}_t g(\theta_t) \right] \\ &= (g^{\text{lin}}(\theta_t) - g(\theta_t)) - \eta_0 \hat{\Theta}_0 (g^{\text{lin}}(\theta_t) - g(\theta_t)) + \eta_0 (\hat{\Theta}_0 - \hat{\Theta}_t) g(\theta_t) \\ &= (I - \eta_0 \hat{\Theta}_0) (g^{\text{lin}}(\theta_t) - g(\theta_t)) + \eta_0 (\hat{\Theta}_0 - \hat{\Theta}_t) g(\theta_t) \\ &= \dots \\ &= \eta_0 \sum_{s=1}^t (I - \eta_0 \hat{\Theta}_0)^{t-s} (\hat{\Theta}_0 - \hat{\Theta}_s) g(\theta_s). \end{aligned}$$

It follows that the gap between the network's prediction error (i.e., the network's output minus the target) and the error of its linear approximation at initialization decreases exponentially with each training step. Moreover, this gap scales on the order of  $1/\sqrt{n}$ , where  $n$  is the network's width.

$$\begin{aligned} &\|g^{\text{lin}}(\theta_{t+1}) - g(\theta_{t+1})\| \\ &\leq \eta_0 \sum_{s=0}^t \left\| I - \eta_0 \hat{\Theta}_0 \right\|^{t-s} \cdot \left\| \hat{\Theta}_0 - \hat{\Theta}_s \right\| \cdot \|g(\theta_s)\| \\ &\leq \eta_0 \cdot \sum_{s=1}^t \left( 1 - \frac{\eta_0 \lambda_{\min}}{3} \right)^{t-s} \cdot \frac{6K^3 R_0}{\lambda_{\min}} n^{-1/2} \cdot \left( 1 - \frac{\eta_0 \lambda_{\min}}{3} \right)^s R_0 \\ &\leq t \left( 1 - \frac{\eta_0 \lambda_{\min}}{3} \right)^t \frac{6K^3 R_0^2 \eta_0}{\lambda_{\min}} n^{-1/2}. \end{aligned}$$

The gap between the network's parameters and those of its linear approximation stems from differences in both the prediction error and the Jacobian of the network output with respect to the parameters. At each training step, these discrepancies accumulate across all previous iterations, as shown by the summation of the terms involving  $g^{\text{lin}}(\theta_s) - g(\theta_s)$  and  $\nabla_{\theta} f(\mathcal{X}, \theta_s) - \nabla_{\theta} f(\mathcal{X}, \theta_0)$ .



$$\begin{aligned}
\theta_{t+1}^{\text{lin}} - \theta_{t+1} &= [\theta_t^{\text{lin}} - \eta \nabla_{\theta} f^{\text{lin}}(\mathcal{X}, \theta_t) g^{\text{lin}}(\theta_t)] - [\theta_t - \eta \nabla_{\theta} f(\mathcal{X}, \theta_t) g(\theta_t)] \\
&= (\theta_t^{\text{lin}} - \theta_t) - \eta (\nabla_{\theta} f^{\text{lin}}(\mathcal{X}, \theta_t) g^{\text{lin}}(\theta_t) - \nabla_{\theta} f(\mathcal{X}, \theta_t) g(\theta_t)) \\
&= \dots = -\eta \sum_{s=0}^t \nabla_{\theta} f^{\text{lin}}(\mathcal{X}, \theta_s) g^{\text{lin}}(\theta_s) - \nabla_{\theta} f(\mathcal{X}, \theta_s) g(\theta_s) \\
&= -\eta \sum_{s=0}^t \nabla_{\theta} f^{\text{lin}}(\mathcal{X}, \theta_s) (g^{\text{lin}}(\theta_s) - g(\theta_s)) - (\nabla_{\theta} f(\mathcal{X}, \theta_s) - \nabla_{\theta} f^{\text{lin}}(\mathcal{X}, \theta_s)) g(\theta_s) \\
&= -\eta \sum_{s=0}^t \nabla_{\theta} f(\mathcal{X}, \theta_0) (g^{\text{lin}}(\theta_s) - g(\theta_s)) - (\nabla_{\theta} f(\mathcal{X}, \theta_s) - \nabla_{\theta} f(\mathcal{X}, \theta_0)) g(\theta_s)
\end{aligned}$$

It follows that

$$\begin{aligned}
&\|\theta_{t+1}^{\text{lin}} - \theta_{t+1}\| \\
&\leq \eta \sum_{s=0}^t \|\nabla_{\theta} f(\mathcal{X}, \theta_0)\| \|g^{\text{lin}}(\theta_s) - g(\theta_s)\| + C_{dJ} \sqrt{n} \|\theta_s - \theta_0\| \|g(\theta_s)\| \\
&\leq \frac{\eta_0}{n} \sum_{s=1}^t C_J \sqrt{n} s \left(1 - \frac{\eta_0 \lambda_{\min}}{3}\right)^{s-1} \frac{6C_J^2 C_{dJ} R_0^2 \eta_0}{\lambda_{\min}} \frac{1}{\sqrt{n}} + C_{dJ} \sqrt{n} \cdot \frac{3C_J R_0}{\lambda_{\min}} \frac{1}{\sqrt{n}} \cdot \left(1 - \frac{\eta_0 \lambda_{\min}}{3}\right)^s R_0 \\
&\leq \left( \frac{6C_J^3 C_{dJ} R_0^2 \eta_0^2}{\lambda_{\min}} \frac{9}{\eta_0^2 \lambda_{\min}^2} + C_{dJ} \frac{3C_J R_0}{\lambda_{\min}} \frac{3}{\eta_0 \lambda_{\min}} R_0 \right) \frac{1}{n}.
\end{aligned}$$

**(iv) Bounding the KL divergence between original and linearized learning.**

Let  $p_k^{\text{inc}}(\bullet|\theta) = \mathcal{N}(\mu_{\text{orig},k}(\theta), \Sigma_{\text{orig},k}(\theta))$  be the distribution of The original network's increments, and  $q_k^{\text{inc}}(\bullet|\theta) = \mathcal{N}(\mu_{\text{lin},k}(\theta), \Sigma_{\text{lin},k}(\theta))$  be the distribution of The linearized network's increments. The chain rule for K-L divergence in a Markov Process says that the K-L divergence at step  $t$  equals the initial K-L divergence at step 0, which is 0 in our case, plus the K-L divergence between the two different increment distributions  $D_{\text{KL}}(p_k^{\text{inc}}(\cdot|\theta) \| q_k^{\text{inc}}(\cdot|\theta))$ , averaged over  $\theta \sim p_k$ , for  $k = 0, \dots, t-1$ :

$$\begin{aligned}
&D_{\text{KL}}(p_t \| q_t) \\
&= D_{\text{KL}}(p_0 \| q_0) + \sum_{k=0}^{t-1} \mathbf{E}_{\theta \sim p_k} [D_{\text{KL}}(p_k^{\text{inc}}(\cdot|\theta) q_k^{\text{inc}}(\cdot|\theta))] \\
&= \sum_{k=0}^{t-1} \mathbf{E}_{\theta \sim p_k} \left[ \frac{1}{2} \text{tr} \left( \Sigma_k^{\text{lin}-1} (\Sigma_k(\theta) - \Sigma_k^{\text{lin}} + (\mu_k^{\text{lin}} - \mu_k(\theta))(\mu_k^{\text{lin}} - \mu_k(\theta))^{\top}) \right) + \frac{1}{2} \ln \left( \frac{\det(\Sigma_k^{\text{lin}})}{\det(\Sigma_k(\theta))} \right) \right] \\
&\leq \frac{1}{2} \text{rank}(\Sigma_t) \|\Sigma_t^{\text{lin}-1}\|_{\text{op}} \|\theta_t^{\text{lin}} - \theta_t\|^2 + \frac{1}{2} \text{rank}(\Sigma_t) \|\Sigma_t^{\text{lin}-\frac{1}{2}}\|_{\text{op}}^2 \|\Sigma_t^{\text{lin}} - \Sigma_t\| \\
&\leq \frac{1}{2} \text{rank}(\Sigma_t) \|\Sigma_t^{\text{lin}-1}\|_{\text{op}} \|\theta_t^{\text{lin}} - \theta_t\|^2 + \frac{1}{2} \text{rank}(\Sigma_t) \|\Sigma_t^{\text{lin}-\frac{1}{2}}\|_{\text{op}}^2 \|\theta_t^{\text{lin}} - \theta_t\|^2 \\
&\leq n \cdot (\sigma_0^{-2} + \sigma^{-2} \lambda_{\max}(\Theta)) \cdot C_{\theta} \text{approx} \frac{1}{n^2} \leq C_{\text{KL}} \frac{1}{n}
\end{aligned}$$

**(v) Applying the PAC-Bayes argument.**

Let  $\tilde{R}(\theta)$  be the (linearized) proxy risk. Since  $\|f(\theta_t) - f^{\text{lin}}(\theta_t)\| = O(1/\sqrt{n})$ , the actual model mismatch in the loss is  $O(1/n)$ . Likewise, we have  $D_{\text{KL}}(\rho \| \pi_{\exp(-\beta \tilde{R})}) = O(1/n)$ . Substituting these terms into the standard PAC-Bayes bound gives:

$$\mathbf{E}_{\pi_{\exp(-\lambda r)}}[R(\theta)] \leq \left( \left(1 + \frac{1}{1-\xi} g\left(\frac{\lambda}{N}\right) \frac{\lambda}{N}\right) \mathbf{E}_{\rho}[\tilde{R}(\theta)] + \frac{1}{(1-\xi)\lambda} \left( \frac{C_{\text{KL}}}{n} + \log\left(\frac{2}{\epsilon}\right) \right) \right) / \left(1 - \frac{1}{1-\xi} g\left(\frac{\lambda}{N}\right) \frac{\lambda}{N}\right),$$

which completes the proof of the claimed order- $\frac{1}{n}$  (width) and order- $\frac{1}{N}$  (sample size) complexity terms under assumptions (A1)–(A5).  $\square$

## B Experimental Details

We describe the standard experimental configurations used for the benchmarks and tasks presented in Section 4. All models are trained using widely adopted protocols from their respective foundational papers or community baselines. Training is performed on a single NVIDIA A100 GPU, with batch sizes and runtimes selected to ensure convergence within approximately 24 hours. No data augmentation or enhancement is applied beyond basic preprocessing to ensure consistency in accounting for dataset size when evaluating PAC-Bayes generalization bounds.

### B.1 Vision Benchmarks

**MNIST.** We evaluate two classic architectures for MNIST digit classification: a fully connected network (FCN) with three hidden layers of 600 ReLU units each, and LeNet-5[17], which consists of two convolutional layers (6 and 16 filters of size  $5 \times 5$ ), followed by two fully connected layers with 120 and 84 units, and a 10-way softmax output. Input images are normalized to the range  $[0, 1]$ , with no data augmentation. We train each model using the Adam optimizer with initial learning rate  $1 \times 10^{-3}$ , batch size 128, and cross-entropy loss for 100 epochs. Learning rate is decayed by a factor of 0.1 at epochs 60 and 90. No dropout, batch normalization, or regularization is applied.

**CIFAR-10/100.** We consider three standard architectures: ResNet-50[18], WideResNet-28-10[19], and DenseNet-BC-100-12[20]. Input images are normalized channel-wise using CIFAR-10 statistics (mean =  $[0.491, 0.482, 0.447]$ , std =  $[0.247, 0.243, 0.262]$ ). No data augmentation (e.g., cropping, flipping, MixUp, CutMix) is used to maintain countable sample size for PAC-Bayes analysis. Reference implementations for all listed CIFAR models, including ResNet, VGG, GoogLeNet, MobileNet, PreActResNet, ShuffleNet, and DenseNet, are available in the `kuangliu/pytorch-cifar` repository.

The ResNet-50 used here is the CIFAR variant, where the initial  $7 \times 7$  conv and max pooling are replaced with a single  $3 \times 3$  conv, and the downsampling stages follow the  $6n + 2$  bottleneck pattern with increasing channel widths (16, 32, 64). We use SGD with Nesterov momentum (0.9), weight decay  $5 \times 10^{-4}$ , and batch size 128. The initial learning rate is 0.1, decayed by a factor of 0.2 at epochs 60, 120, and 160. Total training lasts 200 epochs.

WRN-28-10 widens all convolutional blocks by a factor of 10 and follows the pre-activation design (BN-ReLU-Conv). A dropout of 0.3 is applied between convolutional layers within residual blocks. The network is trained using the same optimizer and schedule as above.

For DenseNet-BC, we follow the  $L = 100$ ,  $k = 12$  configuration. The model consists of three dense blocks interleaved with transition layers that apply  $1 \times 1$  convolution and  $2 \times 2$  average pooling. Bottleneck layers and compression (growth rate reduction) are applied as in the original paper. Dropout of 0.2 is used throughout. Training uses SGD with momentum 0.9, batch size 128, initial learning rate 0.1, and learning rate drops at epochs 150 and 225, for a total of 300 epochs.

**ImageNet.** We evaluate ResNet-50[18], DenseNet-121[20], and EfficientNet-B0[21] on ImageNet-1k. Images are resized to  $256 \times 256$  via bicubic interpolation. At training time, random crops of size  $224 \times 224$  and horizontal flips are applied once per image. At test time, center crops of  $224 \times 224$  are used. Pixel values are normalized using ImageNet mean and standard deviation (mean =  $[0.485, 0.456, 0.406]$ , std =  $[0.229, 0.224, 0.225]$ ).

ResNet-50 follows the standard configuration with a  $7 \times 7$  initial convolution (stride 2), max pooling, four stages of bottleneck residual blocks with channel sizes  $[256, 512, 1024, 2048]$ , and global average pooling before the classifier. DenseNet-121 consists of four dense blocks with growth rate 32, compression at transition layers, and bottleneck layers with  $1 \times 1$  convolutions. EfficientNet-B0 uses inverted bottleneck MBConv blocks with squeeze-and-excitation and compound scaling.

Models are trained for 120 epochs using SGD with momentum 0.9, initial learning rate 0.1, and batch size 256. The learning rate decays by a factor of 10 at epochs 30, 60, and 90. No label smoothing, RandAugment, MixUp, or repeated augmentation is used. Each model completes training in approximately two days. Reference implementations for ResNet, DenseNet, and EfficientNet are available in `torchvision.models`, `keras.applications`, and `timm`, with ImageNet training pipelines provided in repositories such as `pytorch/examples/imagenet`.

## 753 B.2 Semantic Segmentation

754 We evaluate semantic segmentation on the Cityscapes dataset using a standard U-Net architecture  
755 with an ImageNet-pretrained ResNet-34 encoder. Images are resized to 256×512, center-cropped if  
756 necessary, and normalized using Cityscapes mean and standard deviation. The model follows the  
757 encoder-decoder pattern with skip connections between symmetric encoder and decoder blocks, each  
758 containing two convolutional layers followed by batch normalization and ReLU activations. The  
759 decoder upsamples spatial resolution using transposed convolutions.

760 Training is performed using the Adam optimizer (learning rate  $1 \times 10^{-4}$ , batch size 8) for 100 epochs.  
761 We use a pixel-wise cross-entropy loss over 19 semantic classes. No label smoothing or augmentation  
762 is applied. All layers are probabilistic except the final segmentation head, which remains deterministic.  
763 We evaluate performance on the validation set using mean Intersection-over-Union (mIoU). We train  
764 using pixel-wise cross-entropy loss and evaluate using mIoU, following standard Cityscapes protocol.  
765 Our PAC-Bayes bound formally applies to the expected cross-entropy loss, which correlates well  
766 with mIoU in practice. Our configuration is consistent with widely used U-Net implementations such  
767 as `keras-unet-collection` and `segmentation_models.pytorch`.

## 768 B.3 GLUE Fine-tuning with GPT-2 + LoRA

769 We fine-tune GPT-2-small (124M parameters) on three classification tasks from the GLUE  
770 benchmark[26]—MRPC, SST-2, and RTE—using a parameter-efficient fine-tuning setup with LoRA  
771 [27]. Our protocol builds on standard GPT-2 token classification with causal language modeling:  
772 each input is serialized as a prompt (e.g., “sentence1 <sep> sentence2”) followed by a label token  
773 (“Yes”, “No”, “Positive”, etc.), and the model is trained using next-token cross-entropy loss over  
774 the label position. This formulation enables us to reuse standard language model heads without  
775 modifying the decoder architecture.

776 We adopt the GPT-2 tokenizer with a maximum sequence length of 128 tokens and batch size 32. We  
777 use AdamW with learning rate  $2 \times 10^{-5}$ ,  $\beta_1 = 0.9$ ,  $\beta_2 = 0.98$ , and  $\epsilon = 10^{-8}$ . Weight decay is set to  
778 zero, and training runs for 10 epochs unless early stopping is triggered. Our setup follows the Keras  
779 example Parameter-efficient fine-tuning of GPT-2 with LoRA [https://keras.io/examples/nlp/parameter\\_efficient\\_finetuning\\_of\\_gpt2\\_with\\_lora/](https://keras.io/examples/nlp/parameter_efficient_finetuning_of_gpt2_with_lora/) and Hugging Face’s adapter-based  
780 fine-tuning pipelines, with GPT-2 checkpoints loaded from the Hugging Face model hub.

782 We inject LoRA adapters into the GPT-2 self-attention blocks, targeting the query and value projection  
783 matrices in each transformer layer. Each LoRA module is a rank-4 adapter with scaling factor  $\alpha = 32$   
784 and dropout 0.05. The base GPT-2 weights remain frozen throughout training. For classification, we  
785 project the final token’s hidden state onto a softmax over verbalized class tokens (e.g., “Yes”, “No”),  
786 computing loss on the generated token. This verbalizer-based approach avoids architectural changes  
787 while preserving interpretability.

788 To apply our localized PAC-Bayes bound, we replace the standard loss with a variational objective  
789 defined over the LoRA parameters. These adapters are reparameterized as Gaussian posteriors, and  
790 the mini-batch is partitioned into  $K = 8$  shards. For each shard, we sample LoRA weights and  
791 compute predictions, aggregating empirical risk via importance-weighted averaging. KL divergence  
792 is estimated from the same samples. Bound parameters  $\lambda$  and  $\xi$  are jointly optimized with the adapter  
793 weights using a reparameterized sigmoid transformation. The training loop and data pipeline are  
794 otherwise unchanged, demonstrating that our PAC-Bayes loss integrates seamlessly into standard  
795 fine-tuning workflows.

796 We report training and validation losses as well as PAC-Bayes generalization bounds (Eq. 3).

## 797 B.4 PAC-Bayes Training Details

798 We implement our localized PAC-Bayes training procedure as a drop-in replacement for standard  
799 training workflows. Our method defines a single-pass objective that integrates importance-weighted  
800 empirical risk estimation with reparameterized posterior sampling and KL regularization, enabling  
801 seamless compatibility with Keras, TensorFlow, and analogous PyTorch abstractions.

802 For each model, we replace standard deterministic layers with variational layers (e.g., reparameterized  
803 dense or convolutional layers with learned Gaussian posteriors), where posterior samples are drawn

804 using the reparameterization trick. At each training step, the mini-batch is split into  $K = 4$  shards,  
805 and  $K$  forward passes are used to approximate expectations with importance weighting. Our loss  
806 replaces the standard cross-entropy loss with a PAC-Bayes bound involving data-dependent estimates  
807 of empirical risk, KL divergence, and importance-weighted log-partition estimate.

808 To control the bound’s tightness and ensure numerical stability, we jointly optimize two scalar  
809 parameters  $(\lambda, \xi)$  using reparameterized sigmoid transformations. These parameters are clipped to  
810 remain in a numerically stable range. The parameter  $\xi$ , in particular, governs the balance between  
811 empirical fit and regularization. The bound uses a Bernstein-type inequality combined with the  
812 Donsker–Varadhan variational form to achieve tight guarantees under approximate posterior sampling.

813 Posterior and prior distributions are modularized at the layer level and managed through lightweight  
814 wrappers. The full PAC-Bayes loss, including posterior sampling and KL terms, is evaluated during  
815 each forward pass and is fully differentiable. In frameworks like Keras, this integrates naturally  
816 via model compilation and fitting. In PyTorch or JAX, the same logic can be incorporated directly  
817 within the standard mini-batch training loop, without requiring two-pass estimation, KL annealing, or  
818 external scheduling. This makes our method easily portable across ecosystems with minimal changes  
819 to model or training code.

820 Our implementation avoids reliance on specialized inference libraries and instead uses lightweight  
821 wrappers that expose posterior sampling and KL evaluation in a modular form. In PyTorch, these  
822 components can be integrated as attributes of standard `exttnn.Module` classes, enabling straightfor-  
823 ward porting of posterior logic into existing model definitions. Our approach parallels existing PEFT  
824 (parameter-efficient fine-tuning) strategies such as LoRA or Adapter modules, in the sense that it  
825 “injects” stochastic behavior inside existing model layers without rewriting the full training logic.  
826 Crucially, our PAC-Bayes loss is computed inline with the model’s forward and backward passes,  
827 without requiring separate optimization stages or KL annealing. This design allows it to be integrated  
828 into standard training loops across architectures and frameworks.

829 All posterior layers are initialized with random priors and appropriate variance scaling. The PAC-  
830 Bayes loss is fully compatible with standard Keras callbacks, model checkpointing, and TensorBoard  
831 logging.

## 832 B.5 Certifiable Prediction

833 Post-training, we use the same posterior distribution to derive per-example prediction certificates. For  
834 each test input, we compute the expected 0–1 loss under posterior sampling via importance-weighted  
835 risk estimation. We then apply a single-sample Markov bound and a union bound across the test  
836 set to produce a certified upper bound on the misclassification risk of each individual prediction, as  
837 formalized in Eq. 4.

838 This certifiable risk enables a rejection mechanism: predictions whose estimated risk exceeds a  
839 chosen threshold can be flagged or abstained from, ensuring reliable deployment in safety-critical  
840 applications. Our experiments visualize the full risk distribution and demonstrate that adversarial  
841 or misclassified samples tend to exhibit significantly higher certified risk than correctly predicted  
842 ones. We also evaluate calibration curves and find that PAC-Bayes risk estimates align closely with  
843 empirical misclassification rates, supporting their use for uncertainty-aware selective prediction.

## 844 B.6 Software and Reproducibility

845 All models are implemented in TensorFlow 2.12 with Keras 2 and HuggingFace Transformers 4.28  
846 (for GPT-2 LoRA fine-tuning). Training is conducted in Google Colab using a single NVIDIA  
847 A100 GPU with 40 GB of memory. To ensure feasibility under Colab constraints, all experiments  
848 are designed to complete within a single 24-hour session. Our codebase is written in R and uses  
849 the `reticulate` package to interface with Python modules. Due to compatibility requirements of  
850 TensorFlow Probability, we restrict the software environment to Python 3.10 and TensorFlow <=2.15.  
851 Code and configuration scripts for all experiments will be made available upon publication.

## C Concentration Inequalities and PAC-Bayes Bounds

This section presents a self-contained statement and derivation of the key inequalities underlying PAC-Bayes bound. Our goal is to help readers unfamiliar with PAC-Bayes theory or concentration inequalities appreciate the theoretical structure and understand how our bound emerges naturally from classical tools.

We begin with the simplest and most foundational of these: Markov's inequality. It formalizes the intuitive idea that if a random variable tends to be small on average, then large values must be rare. This simple insight is the root of a broad family of results known as concentration inequalities, which describe how tightly a random variable tends to concentrate around its average.

**Markov's Inequality.** If  $X \geq 0$  is a nonnegative random variable and  $a > 0$ , then:

$$\mathbf{P}(X \geq a) \leq \frac{\mathbf{E}[X]}{a}.$$

*Proof.* Let  $A = \{X \geq a\}$ . Then:

$$\mathbf{E}[X] = \int_{\Omega} X(\omega) d\mathbf{P}(\omega) \geq \int_A X(\omega) d\mathbf{P}(\omega) \geq \int_A a d\mathbf{P}(\omega) = a \cdot \mathbf{P}(X \geq a).$$

Dividing both sides by  $a$  gives the result.  $\square$

Markov's inequality gives weak but general tail bounds. Its real power emerges when we apply it to transformed variables. If large deviations of  $X$  are rare, then so are large values of  $e^{\lambda X}$ . This exponential magnification enables sharper control.

**Hoeffding's Inequality.** Suppose  $X_1, \dots, X_n$  are independent and bounded in  $[0, 1]$ , and let  $\bar{X} = \frac{1}{n} \sum X_i$ . Then for any  $\varepsilon > 0$ :

$$\mathbf{P}(\bar{X} - \mathbf{E}[\bar{X}] \geq \varepsilon) \leq \exp(-2n\varepsilon^2).$$

*Proof.* Consider  $\bar{X} = \frac{1}{n} \sum X_i$ . We apply Markov's inequality to the exponential of the deviation:

$$\mathbf{P}(\bar{X} - \mathbf{E}[\bar{X}] \geq \varepsilon) = \mathbf{P}(e^{\lambda n(\bar{X} - \mathbf{E}[\bar{X}])} \geq e^{\lambda n\varepsilon}) \leq e^{-\lambda n\varepsilon} \mathbf{E}[e^{\lambda n(\bar{X} - \mathbf{E}[\bar{X}])}].$$

By independence, we can factor the expectation:  $\mathbf{E}[e^{\lambda n(\bar{X} - \mathbf{E}[\bar{X}])}] = \prod_{i=1}^n \mathbf{E}[e^{\lambda(X_i - \mathbf{E}[X_i])}]$ .

Apply Hoeffding's lemma: for any  $X_i \in [0, 1]$ , we have  $\mathbf{E}[e^{\lambda(X_i - \mathbf{E}[X_i])}] \leq e^{\lambda^2/8}$ , so

$\mathbf{E}[e^{\lambda n(\bar{X} - \mathbf{E}[\bar{X}])}] \leq e^{n\lambda^2/8}$ . Hoeffding's lemma follows by applying a second-order Taylor expansion to the moment-generating function of a bounded random variable and optimizing over the bound on its range.

Combining this with the previous bound:  $\mathbf{P}(\bar{X} - \mathbf{E}[\bar{X}] \geq \varepsilon) \leq e^{-\lambda n\varepsilon + n\lambda^2/8}$ .

Minimizing the right-hand side wrt  $\lambda$  gives  $\lambda = 4\varepsilon$ , yielding:  $\mathbf{P}(\bar{X} - \mathbf{E}[\bar{X}] \geq \varepsilon) \leq \exp(-2n\varepsilon^2)$ .  $\square$

Hoeffding's inequality provides uniform control over deviations based solely on the bounded range of each variable—it does not consider the variance or how probability mass is distributed within the range. In contrast, Bernstein's inequality makes use of both the variance and a bound on the centered deviations. This allows it to produce tighter bounds when the variance is small, particularly in settings with heterogeneous or skewed noise.

**Bernstein's Inequality.** Let  $\sigma_1, \dots, \sigma_N$  be independent real-valued random variables, each bounded above by  $b$  in deviation from its mean:  $\sigma_i - \mathbf{E}[\sigma_i] \leq b$ . Let  $S = \frac{1}{N} \sum \sigma_i$  be the normalized sum,  $m = \mathbf{E}[S]$  its mean, and  $V = \frac{1}{N} \sum \mathbf{E}[(\sigma_i - \mathbf{E}[\sigma_i])^2]$  its renormalized variance. Then, for any  $\lambda > 0$  and any  $\eta > 0$ :

$$\mathbf{P}(S - m \geq \eta) \leq \exp\left(-\lambda\eta + g\left(\frac{b\lambda}{N}\right) \cdot \frac{V}{N}\lambda^2\right), \quad \text{where } g(x) = \frac{e^x - 1 - x}{x^2}.$$

This exponential moment bound captures both the variance and the tail size of the distribution. We use it directly in our PAC-Bayes analysis to account for heteroskedasticity and sharp transitions in empirical risk estimates.

880 *Proof.* Let  $\sigma_1, \dots, \sigma_N$  be independent real-valued random variables with  $\mathbf{E}[\sigma_i] = \mu_i$  and  $\sigma_i - \mu_i \leq b$   
881 almost surely. Define the empirical average  $S = \frac{1}{N} \sum_{i=1}^N \sigma_i$ , with mean  $m = \mathbf{E}[S] = \frac{1}{N} \sum \mu_i$ , and  
882 define the renormalized variance  $V = \frac{1}{N} \sum \mathbf{E}[(\sigma_i - \mu_i)^2]$ .

We begin by applying Markov's inequality to the exponential: for any  $\lambda > 0$ ,

$$\mathbf{P}(S - m \geq \eta) = \mathbf{P}(e^{\lambda(S-m)} \geq e^{\lambda\eta}) \leq e^{-\lambda\eta} \mathbf{E}[e^{\lambda(S-m)}].$$

By independence, we factor the moment generating function as  $\mathbf{E}[e^{\lambda(S-m)}] = \prod_{i=1}^N \mathbf{E}[e^{\lambda(\sigma_i - \mu_i)/N}]$ .  
Since each  $\sigma_i - \mu_i \leq b$ , we apply the bound  $\log \mathbf{E}[e^{tX}] \leq g(bt) \cdot \mathbf{E}[X^2]$  for  $X$  bounded by  $b$  and  
 $g(x) = \frac{e^x - 1 - x}{x^2}$ , to get

$$\log \mathbf{E}[e^{\lambda(S-m)}] \leq \sum_{i=1}^N g\left(\frac{b\lambda}{N}\right) \cdot \frac{1}{N^2} \cdot \mathbf{E}[(\sigma_i - \mu_i)^2] = g\left(\frac{b\lambda}{N}\right) \cdot \frac{V}{N} \cdot \lambda^2.$$

Putting everything together:

$$\mathbf{P}(S - m \geq \eta) \leq \exp\left(-\lambda\eta + g\left(\frac{b\lambda}{N}\right) \cdot \frac{V}{N} \lambda^2\right).$$

883 This bound holds for all  $\lambda > 0$ ; optimizing it over  $\lambda$  yields the standard Bernstein tail bound.  $\square$

884 The following Donsker-Varadhan variational formula connects the moment-generating function (i.e.,  
885 the log of the expected exponentiated  $f$ ) to a variational optimization over distributions  $\rho$ . It is  
886 especially powerful when  $f$  represents a deviation, such as  $f(\theta) = \lambda(r_S(\theta) - R(\theta))$ , which is  
887 common in PACBayes theory.

888 The inequality shows that rather than analyzing  $\mathbf{E}_\pi[e^f]$  directly, we can upper bound it using any  
889 distribution  $\rho$ , at the cost of a KL divergence penalty. In PAC-Bayes,  $\pi$  serves as the prior and  $\rho$  as  
890 the learned posterior, making this identity the key bridge between exponential moment bounds and  
891 generalization guarantees.

**Donsker-Varadhan Variational Formula.** Let  $\pi$  be a probability distribution over a space  $\Theta$ , and  
let  $f : \Theta \rightarrow \mathbf{R}$  be measurable and integrable under  $\pi$ . Then:

$$\log \mathbf{E}_\pi[e^{f(\theta)}] = \sup_{\rho} \{\mathbf{E}_\rho[f(\theta)] - \text{KL}(\rho \parallel \pi)\},$$

892 where the supremum is taken over all probability measures  $\rho$  absolutely continuous with respect to  $\pi$ .

*Proof.* Let  $\rho \ll \pi$  (i.e.,  $\rho$  is absolutely continuous with respect to  $\pi$ , meaning  $\rho$  does not assign mass  
where  $\pi$  assigns zero), and define the Radon-Nikodym derivative  $d\rho/d\pi = h$ . In continuous spaces,  
if  $\pi$  has a density  $p(\theta)$  and  $\rho$  has density  $q(\theta)$ , then  $h(\theta) = \frac{q(\theta)}{p(\theta)}$  is the pointwise ratio of densities.  
We write:

$$\mathbf{E}_\rho[f(\theta)] - \text{KL}(\rho \parallel \pi) = \int f(\theta)h(\theta)d\pi(\theta) - \int h(\theta) \log h(\theta)d\pi(\theta).$$

Define a functional  $J(h)$  as

$$J(h) = \int f h d\pi - \int h \log h d\pi,$$

893 subject to the constraint  $\int h d\pi = 1$ , since  $\rho$  must be a probability measure.

Using calculus of variations or Lagrange multipliers to maximize  $J(h)$ , the optimal  $h^*(\theta)$  satisfies

$$f(\theta) - \log h^*(\theta) - 1 - \lambda = 0 \quad \Rightarrow \quad h^*(\theta) = \frac{e^{f(\theta)}}{Z}, \quad Z = \int e^{f(\theta)} d\pi(\theta).$$

Plugging this optimal  $h^*$  back into the original expression gives

$$\sup_{\rho} \{\mathbf{E}_\rho[f] - \text{KL}(\rho \parallel \pi)\} = \log \int e^{f(\theta)} d\pi(\theta) = \log \mathbf{E}_\pi[e^{f(\theta)}],$$

894 as claimed.  $\square$

895 The following PAC-Bayes bound, due to Catoni [6], provides a generalization guarantee for random-  
 896 ized predictors drawn from a posterior distribution  $\rho$ , in terms of their empirical risk and divergence  
 897 from a prior  $\pi$ . Unlike classical uniform convergence bounds, which struggle with infinite or continu-  
 898 ous hypothesis spaces, this approach avoids union bounds altogether by reasoning about the expected  
 899 behavior under  $\rho$ , using the Donsker–Varadhan variational identity.

**Catoni’s PAC-Bayes bound**[6] Let  $\pi$  be a prior distribution over parameters  $\theta \in \Theta$ , and let  $\rho$  be any posterior distribution. Assume that for all  $\theta$ , the loss function  $\ell(\theta; x, y) \in [0, C]$  is bounded. Then for any  $\lambda > 0$  and  $\delta \in (0, 1)$ , with probability at least  $1 - \delta$  over the draw of a dataset  $S = \{(x_i, y_i)\}_{i=1}^N$ , we have:

$$\mathbf{E}_{\theta \sim \rho}[R(\theta)] \leq \mathbf{E}_{\theta \sim \rho}[r_S(\theta)] + \frac{\lambda C^2}{8N} + \frac{\text{KL}(\rho \parallel \pi) + \log(1/\delta)}{\lambda}.$$

900 *Proof.* Fix any  $\theta \in \Theta$ . By Hoeffding’s inequality applied to  $\ell_i(\theta) \in [0, C]$ , we have for any  $t > 0$ :

901  $\mathbf{E}_S \left[ e^{t \cdot N(R(\theta) - r_S(\theta))} \right] \leq e^{\frac{t^2 N C^2}{8}}$ . Setting  $t = \lambda/N$ :  $\mathbf{E}_S \left[ e^{\lambda(R(\theta) - r_S(\theta))} \right] \leq e^{\frac{\lambda^2 C^2}{8N}}$ .

902 Integrate this bound over  $\theta \sim \pi$ :  $\mathbf{E}_{S, \theta \sim \pi} \left[ e^{\lambda(R(\theta) - r_S(\theta))} \right] \leq e^{\frac{\lambda^2 C^2}{8N}}$ . By Fubini’s theorem, we  
 903 exchange the order of integration:  $\mathbf{E}_S \left[ \mathbf{E}_{\theta \sim \pi} \left[ e^{\lambda(R(\theta) - r_S(\theta))} \right] \right] \leq e^{\frac{\lambda^2 C^2}{8N}}$ .

Apply the Donsker–Varadhan variational formula to the inner expectation:

$$\mathbf{E}_S \left[ \exp \left( \sup_{\rho} \{ \lambda \mathbf{E}_{\rho}[R(\theta) - r_S(\theta)] - \text{KL}(\rho \parallel \pi) \} \right) \right] \leq e^{\frac{\lambda^2 C^2}{8N}}.$$

904 Apply a Chernoff bound: for any  $s > 0$ ,  $\mathbf{P}_S \left( \sup_{\rho} \lambda \mathbf{E}_{\rho}[R - r_S] - \text{KL}(\rho \parallel \pi) > \frac{\lambda^2 C^2}{8N} + s \right) \leq e^{-s}$ .

Setting  $s = \log(1/\delta)$  and rearranging gives:

$$\mathbf{P}_S \left( \exists \rho : \mathbf{E}_{\rho}[R(\theta)] > \mathbf{E}_{\rho}[r_S(\theta)] + \frac{\lambda C^2}{8N} + \frac{\text{KL}(\rho \parallel \pi) + \log(1/\delta)}{\lambda} \right) \leq \delta.$$

905 Taking the complement concludes the proof.  $\square$

906 The following KL-risk formulation, commonly seen in the PAC-Bayes literature, is due to  
 907 McAllester [1] and Langford–Seeger [3]. It directly bounds the KL divergence between the ex-  
 908 pected empirical risk and the expected true risk. However, directly optimizing this bound with  
 909 respect to  $\rho$  is challenging in practice. We do not use this bound in our work but include it here for  
 910 completeness.

**Theorem (PAC-Bayes Bound via KL of Risks).** Let  $\pi$  be a prior distribution over predictors  $\theta \in \Theta$ , and let  $\rho$  be any posterior. For any  $\delta \in (0, 1)$  and integer  $N \geq 2$ , with probability at least  $1 - \delta$  over the draw of dataset  $S \sim D^N$ , the following inequality holds:

$$\text{KL}(\mathbf{E}_{\rho}[r_S(\theta)] \parallel \mathbf{E}_{\rho}[R(\theta)]) \leq \frac{\text{KL}(\rho \parallel \pi) + \log \frac{N}{\delta}}{N - 1}.$$

911 *Proof.* Let  $f(\theta) = (N - 1) \text{KL}(r_S(\theta) \parallel R(\theta))$ , and apply the Donsker–Varadhan inequality:  
 912  $\mathbf{E}_{\rho}[f(\theta)] \leq \text{KL}(\rho \parallel \pi) + \log \mathbf{E}_{\pi} [e^{f(\theta)}]$ . Taking expectation over the sample  $S$  and applying Fubini  
 913 gives:  $\mathbf{E}_S \mathbf{E}_{\rho}[f(\theta)] \leq \text{KL}(\rho \parallel \pi) + \log \mathbf{E}_{S, \theta \sim \pi} [e^{f(\theta)}]$ .

To control the exponential moment, define  $p = R(\theta)$ ,  $q = r_S(\theta)$ , and note that  $\hat{e}(h, S)$  is a Binomial( $N, p$ ) proportion. Using an explicit bound on the moment-generating function of  $(N - 1) \text{KL}(q \parallel p)$  under the binomial sampling process, we can show:

$$\mathbf{E}_S \left[ e^{(N-1) \text{KL}(r_S(\theta) \parallel R(\theta))} \right] \leq N, \quad \text{uniformly in } \theta.$$

Applying Markov’s inequality, with probability at least  $1 - \delta$ ,

$$\log \mathbf{E}_{\pi} \left[ e^{(N-1) \text{KL}(r_S(\theta) \parallel R(\theta))} \right] \leq \log \frac{N}{\delta}.$$

Plugging this into the earlier bound, and dividing both sides by  $N - 1$ , we conclude:

$$\text{KL}(\mathbf{E}_{\rho}[r_S(\theta)] \parallel \mathbf{E}_{\rho}[R(\theta)]) \leq \frac{\text{KL}(\rho \parallel \pi) + \log \frac{N}{\delta}}{N - 1}.$$

914  $\square$

## NeurIPS Paper Checklist

### 1. Claims

Question: Do the main claims made in the abstract and introduction accurately reflect the paper's contributions and scope?

Answer: [\[Yes\]](#)

Justification: The abstract and introduction clearly and accurately reflect the theoretical and empirical contributions demonstrated in Sections 3 and 4.

Guidelines:

- The answer NA means that the abstract and introduction do not include the claims made in the paper.
- The abstract and/or introduction should clearly state the claims made, including the contributions made in the paper and important assumptions and limitations. A No or NA answer to this question will not be perceived well by the reviewers.
- The claims made should match theoretical and experimental results, and reflect how much the results can be expected to generalize to other settings.
- It is fine to include aspirational goals as motivation as long as it is clear that these goals are not attained by the paper.

### 2. Limitations

Question: Does the paper discuss the limitations of the work performed by the authors?

Answer: [\[Yes\]](#)

Justification: Limitations, including biases from finite-sample importance sampling and GPU implementation efficiency, are explicitly discussed in the "Limitations and Broader Impacts" section.

Guidelines:

- The answer NA means that the paper has no limitation while the answer No means that the paper has limitations, but those are not discussed in the paper.
- The authors are encouraged to create a separate "Limitations" section in their paper.
- The paper should point out any strong assumptions and how robust the results are to violations of these assumptions (e.g., independence assumptions, noiseless settings, model well-specification, asymptotic approximations only holding locally). The authors should reflect on how these assumptions might be violated in practice and what the implications would be.
- The authors should reflect on the scope of the claims made, e.g., if the approach was only tested on a few datasets or with a few runs. In general, empirical results often depend on implicit assumptions, which should be articulated.
- The authors should reflect on the factors that influence the performance of the approach. For example, a facial recognition algorithm may perform poorly when image resolution is low or images are taken in low lighting. Or a speech-to-text system might not be used reliably to provide closed captions for online lectures because it fails to handle technical jargon.
- The authors should discuss the computational efficiency of the proposed algorithms and how they scale with dataset size.
- If applicable, the authors should discuss possible limitations of their approach to address problems of privacy and fairness.
- While the authors might fear that complete honesty about limitations might be used by reviewers as grounds for rejection, a worse outcome might be that reviewers discover limitations that aren't acknowledged in the paper. The authors should use their best judgment and recognize that individual actions in favor of transparency play an important role in developing norms that preserve the integrity of the community. Reviewers will be specifically instructed to not penalize honesty concerning limitations.

### 3. Theory assumptions and proofs

Question: For each theoretical result, does the paper provide the full set of assumptions and a complete (and correct) proof?



Answer: [\[Yes\]](#)

Justification: All theoretical assumptions are explicitly stated in the main paper, and formal proofs appear fully in the appendix.

Guidelines:

- The answer NA means that the paper does not include theoretical results.
- All the theorems, formulas, and proofs in the paper should be numbered and cross-referenced.
- All assumptions should be clearly stated or referenced in the statement of any theorems.
- The proofs can either appear in the main paper or the supplemental material, but if they appear in the supplemental material, the authors are encouraged to provide a short proof sketch to provide intuition.
- Inversely, any informal proof provided in the core of the paper should be complemented by formal proofs provided in appendix or supplemental material.
- Theorems and Lemmas that the proof relies upon should be properly referenced.

#### 4. Experimental result reproducibility

Question: Does the paper fully disclose all the information needed to reproduce the main experimental results of the paper to the extent that it affects the main claims and/or conclusions of the paper (regardless of whether the code and data are provided or not)?

Answer: [\[Yes\]](#)

Justification: Experimental details including datasets, model architectures, training procedures, and hyperparameters are explicitly stated in Section 4 and detailed in appendix.

Guidelines:

- The answer NA means that the paper does not include experiments.
- If the paper includes experiments, a No answer to this question will not be perceived well by the reviewers: Making the paper reproducible is important, regardless of whether the code and data are provided or not.
- If the contribution is a dataset and/or model, the authors should describe the steps taken to make their results reproducible or verifiable.
- Depending on the contribution, reproducibility can be accomplished in various ways. For example, if the contribution is a novel architecture, describing the architecture fully might suffice, or if the contribution is a specific model and empirical evaluation, it may be necessary to either make it possible for others to replicate the model with the same dataset, or provide access to the model. In general, releasing code and data is often one good way to accomplish this, but reproducibility can also be provided via detailed instructions for how to replicate the results, access to a hosted model (e.g., in the case of a large language model), releasing of a model checkpoint, or other means that are appropriate to the research performed.
- While NeurIPS does not require releasing code, the conference does require all submissions to provide some reasonable avenue for reproducibility, which may depend on the nature of the contribution. For example
  - (a) If the contribution is primarily a new algorithm, the paper should make it clear how to reproduce that algorithm.
  - (b) If the contribution is primarily a new model architecture, the paper should describe the architecture clearly and fully.
  - (c) If the contribution is a new model (e.g., a large language model), then there should either be a way to access this model for reproducing the results or a way to reproduce the model (e.g., with an open-source dataset or instructions for how to construct the dataset).
  - (d) We recognize that reproducibility may be tricky in some cases, in which case authors are welcome to describe the particular way they provide for reproducibility. In the case of closed-source models, it may be that access to the model is limited in some way (e.g., to registered users), but it should be possible for other researchers to have some path to reproducing or verifying the results.

#### 5. Open access to data and code

1022 Question: Does the paper provide open access to the data and code, with sufficient instruc-  
1023 tions to faithfully reproduce the main experimental results, as described in supplemental  
1024 material?

1025 Answer: [Yes]

1026 Justification: An anonymized version of the code, along with detailed instructions for  
1027 reproducing the main experiments, is included in the supplementary material. The full,  
1028 non-anonymized code will be publicly released upon acceptance.

1029 Guidelines:

- 1030 • The answer NA means that paper does not include experiments requiring code.
- 1031 • Please see the NeurIPS code and data submission guidelines (<https://nips.cc/public/guides/CodeSubmissionPolicy>) for more details.
- 1032 • While we encourage the release of code and data, we understand that this might not be  
1033 possible, so “No” is an acceptable answer. Papers cannot be rejected simply for not  
1034 including code, unless this is central to the contribution (e.g., for a new open-source  
1035 benchmark).
- 1036 • The instructions should contain the exact command and environment needed to run to  
1037 reproduce the results. See the NeurIPS code and data submission guidelines (<https://nips.cc/public/guides/CodeSubmissionPolicy>) for more details.
- 1038 • The authors should provide instructions on data access and preparation, including how  
1039 to access the raw data, preprocessed data, intermediate data, and generated data, etc.
- 1040 • The authors should provide scripts to reproduce all experimental results for the new  
1041 proposed method and baselines. If only a subset of experiments are reproducible, they  
1042 should state which ones are omitted from the script and why.
- 1043 • At submission time, to preserve anonymity, the authors should release anonymized  
1044 versions (if applicable).
- 1045 • Providing as much information as possible in supplemental material (appended to the  
1046 paper) is recommended, but including URLs to data and code is permitted.

## 1047 6. Experimental setting/details

1050 Question: Does the paper specify all the training and test details (e.g., data splits, hyper-  
1051 parameters, how they were chosen, type of optimizer, etc.) necessary to understand the  
1052 results?

1053 Answer: [Yes]

1054 Justification: Training and evaluation details including data splits, model architectures, opti-  
1055 mizers, and hyperparameters are explicitly provided in Section 4 and detailed in appendix.

1056 Guidelines:

- 1057 • The answer NA means that the paper does not include experiments.
- 1058 • The experimental setting should be presented in the core of the paper to a level of detail  
1059 that is necessary to appreciate the results and make sense of them.
- 1060 • The full details can be provided either with the code, in appendix, or as supplemental  
1061 material.

## 1062 7. Experiment statistical significance

1063 Question: Does the paper report error bars suitably and correctly defined or other appropriate  
1064 information about the statistical significance of the experiments?

1065 Answer: [Yes]

1066 Justification: We explicitly report error bars (standard deviations across multiple runs) in  
1067 tables and figures. The sources of variability (e.g., random initialization and data splits) and  
1068 calculation methods (bootstrap or multiple independent runs) are clearly described in the  
1069 appendix.

1070 Guidelines:

- 1071 • The answer NA means that the paper does not include experiments.
- 1072 • The authors should answer "Yes" if the results are accompanied by error bars, confi-  
1073 dence intervals, or statistical significance tests, at least for the experiments that support  
1074 the main claims of the paper.

- The factors of variability that the error bars are capturing should be clearly stated (for example, train/test split, initialization, random drawing of some parameter, or overall run with given experimental conditions).
- The method for calculating the error bars should be explained (closed form formula, call to a library function, bootstrap, etc.)
- The assumptions made should be given (e.g., Normally distributed errors).
- It should be clear whether the error bar is the standard deviation or the standard error of the mean.
- It is OK to report 1-sigma error bars, but one should state it. The authors should preferably report a 2-sigma error bar than state that they have a 96% CI, if the hypothesis of Normality of errors is not verified.
- For asymmetric distributions, the authors should be careful not to show in tables or figures symmetric error bars that would yield results that are out of range (e.g. negative error rates).
- If error bars are reported in tables or plots, The authors should explain in the text how they were calculated and reference the corresponding figures or tables in the text.

## 8. Experiments compute resources

Question: For each experiment, does the paper provide sufficient information on the computer resources (type of compute workers, memory, time of execution) needed to reproduce the experiments?

Answer: [Yes]

Justification: We explicitly document the GPU types, memory usage, and approximate runtimes for key experiments in the supplementary material to facilitate reproducibility. Complete details will be provided openly upon acceptance.

Guidelines:

- The answer NA means that the paper does not include experiments.
- The paper should indicate the type of compute workers CPU or GPU, internal cluster, or cloud provider, including relevant memory and storage.
- The paper should provide the amount of compute required for each of the individual experimental runs as well as estimate the total compute.
- The paper should disclose whether the full research project required more compute than the experiments reported in the paper (e.g., preliminary or failed experiments that didn't make it into the paper).

## 9. Code of ethics

Question: Does the research conducted in the paper conform, in every respect, with the NeurIPS Code of Ethics <https://neurips.cc/public/EthicsGuidelines?>

Answer: [Yes]

Justification: Our research fully conforms to the NeurIPS Code of Ethics.

Guidelines:

- The answer NA means that the authors have not reviewed the NeurIPS Code of Ethics.
- If the authors answer No, they should explain the special circumstances that require a deviation from the Code of Ethics.
- The authors should make sure to preserve anonymity (e.g., if there is a special consideration due to laws or regulations in their jurisdiction).

## 10. Broader impacts

Question: Does the paper discuss both potential positive societal impacts and negative societal impacts of the work performed?

Answer: [Yes]

Justification: Positive impacts (increased transparency, trustworthiness) and potential negative impacts (misuse due to misinterpretation of theoretical assumptions) are explicitly discussed in the "Limitations and Broader Impacts" section.

Guidelines:

- The answer NA means that there is no societal impact of the work performed.
- If the authors answer NA or No, they should explain why their work has no societal impact or why the paper does not address societal impact.
- Examples of negative societal impacts include potential malicious or unintended uses (e.g., disinformation, generating fake profiles, surveillance), fairness considerations (e.g., deployment of technologies that could make decisions that unfairly impact specific groups), privacy considerations, and security considerations.
- The conference expects that many papers will be foundational research and not tied to particular applications, let alone deployments. However, if there is a direct path to any negative applications, the authors should point it out. For example, it is legitimate to point out that an improvement in the quality of generative models could be used to generate deepfakes for disinformation. On the other hand, it is not needed to point out that a generic algorithm for optimizing neural networks could enable people to train models that generate Deepfakes faster.
- The authors should consider possible harms that could arise when the technology is being used as intended and functioning correctly, harms that could arise when the technology is being used as intended but gives incorrect results, and harms following from (intentional or unintentional) misuse of the technology.
- If there are negative societal impacts, the authors could also discuss possible mitigation strategies (e.g., gated release of models, providing defenses in addition to attacks, mechanisms for monitoring misuse, mechanisms to monitor how a system learns from feedback over time, improving the efficiency and accessibility of ML).

## 11. Safeguards

Question: Does the paper describe safeguards that have been put in place for responsible release of data or models that have a high risk for misuse (e.g., pretrained language models, image generators, or scraped datasets)?

Answer: [NA]

Justification: The paper does not release high-risk models or datasets.

Guidelines:

- The answer NA means that the paper poses no such risks.
- Released models that have a high risk for misuse or dual-use should be released with necessary safeguards to allow for controlled use of the model, for example by requiring that users adhere to usage guidelines or restrictions to access the model or implementing safety filters.
- Datasets that have been scraped from the Internet could pose safety risks. The authors should describe how they avoided releasing unsafe images.
- We recognize that providing effective safeguards is challenging, and many papers do not require this, but we encourage authors to take this into account and make a best faith effort.

## 12. Licenses for existing assets

Question: Are the creators or original owners of assets (e.g., code, data, models), used in the paper, properly credited and are the license and terms of use explicitly mentioned and properly respected?

Answer: [Yes]

Justification: We clearly cite all datasets used (MNIST, CIFAR-10/100, ImageNet, GLUE, Cityscapes), explicitly provide their URLs, dataset versions, and fully document their licenses in supplemental material.

Guidelines:

- The answer NA means that the paper does not use existing assets.
- The authors should cite the original paper that produced the code package or dataset.
- The authors should state which version of the asset is used and, if possible, include a URL.

- The name of the license (e.g., CC-BY 4.0) should be included for each asset.
- For scraped data from a particular source (e.g., website), the copyright and terms of service of that source should be provided.
- If assets are released, the license, copyright information, and terms of use in the package should be provided. For popular datasets, [paperswithcode.com/datasets](https://paperswithcode.com/datasets) has curated licenses for some datasets. Their licensing guide can help determine the license of a dataset.
- For existing datasets that are re-packaged, both the original license and the license of the derived asset (if it has changed) should be provided.
- If this information is not available online, the authors are encouraged to reach out to the asset's creators.

### 1190 13. New assets

1191 Question: Are new assets introduced in the paper well documented and is the documentation  
1192 provided alongside the assets?

1193 Answer: [NA]

1194 Justification: No new datasets, benchmarks, or assets were introduced.

1195 Guidelines:

- 1196 • The answer NA means that the paper does not release new assets.
- 1197 • Researchers should communicate the details of the dataset/code/model as part of their  
1198 submissions via structured templates. This includes details about training, license,  
1199 limitations, etc.
- 1200 • The paper should discuss whether and how consent was obtained from people whose  
1201 asset is used.
- 1202 • At submission time, remember to anonymize your assets (if applicable). You can either  
1203 create an anonymized URL or include an anonymized zip file.

### 1204 14. Crowdsourcing and research with human subjects

1205 Question: For crowdsourcing experiments and research with human subjects, does the paper  
1206 include the full text of instructions given to participants and screenshots, if applicable, as  
1207 well as details about compensation (if any)?

1208 Answer: [NA]

1209 Justification: The paper does not involve crowdsourcing or research with human subjects.

1210 Guidelines:

- 1211 • The answer NA means that the paper does not involve crowdsourcing nor research with  
1212 human subjects.
- 1213 • Including this information in the supplemental material is fine, but if the main contribu-  
1214 tion of the paper involves human subjects, then as much detail as possible should be  
1215 included in the main paper.
- 1216 • According to the NeurIPS Code of Ethics, workers involved in data collection, curation,  
1217 or other labor should be paid at least the minimum wage in the country of the data  
1218 collector.

### 1219 15. Institutional review board (IRB) approvals or equivalent for research with human 1220 subjects

1221 Question: Does the paper describe potential risks incurred by study participants, whether  
1222 such risks were disclosed to the subjects, and whether Institutional Review Board (IRB)  
1223 approvals (or an equivalent approval/review based on the requirements of your country or  
1224 institution) were obtained?

1225 Answer: [NA]

1226 Justification: The research does not involve human subjects, thus no IRB approval is  
1227 required.

- 1228 • The answer NA means that the paper does not involve crowdsourcing nor research with  
1229 human subjects.

- 1230 • Depending on the country in which research is conducted, IRB approval (or equivalent)  
1231 may be required for any human subjects research. If you obtained IRB approval, you  
1232 should clearly state this in the paper.
- 1233 • We recognize that the procedures for this may vary significantly between institutions  
1234 and locations, and we expect authors to adhere to the NeurIPS Code of Ethics and the  
1235 guidelines for their institution.
- 1236 • For initial submissions, do not include any information that would break anonymity (if  
1237 applicable), such as the institution conducting the review.

#### 1238 16. **Declaration of LLM usage**

1239 Question: Does the paper describe the usage of LLMs if it is an important, original, or  
1240 non-standard component of the core methods in this research? Note that if the LLM is used  
1241 only for writing, editing, or formatting purposes and does not impact the core methodology,  
1242 scientific rigorousness, or originality of the research, declaration is not required.

1243 Answer: [NA]

1244 Justification: LLMs were used solely for editorial assistance (clarifying concepts, editing  
1245 text), and thus no formal declaration is required.

1246 Guidelines:

- 1247 • The answer NA means that the core method development in this research does not  
1248 involve LLMs as any important, original, or non-standard components.
- 1249 • Please refer to our LLM policy (<https://neurips.cc/Conferences/2025/LLM>)  
1250 for what should or should not be described.
